# Supplementary material
Source: PubMed Central journal article supplement (PMC8055207)

# THE LANCET

## Respiratory Medicine

### Supplementary appendix

This appendix formed part of the original submission and has been peer reviewed. We post it as supplied by the authors.

This online publication has been corrected. The corrected version first appeared at [thelancet.com/respiratory](http://thelancet.com/respiratory) on June 29, 2021

Supplement to: Lebreton G, Schmidt M, Ponnaiah M, et al. Extracorporeal membrane oxygenation network organisation and clinical outcomes during the COVID-19 pandemic in Greater Paris, France: a multicentre cohort study. *Lancet Respir Med* 2021; published online April 19. [http://dx.doi.org/10.1016/S2213-2600\(21\)00096-5](http://dx.doi.org/10.1016/S2213-2600(21)00096-5).

## Supplementary appendix

### ECMO network organisation and clinical outcomes during the COVID-19 pandemic in Greater Paris: a retrospective multicentre cohort study

#### Table of contents

|                                                                                                                                                                                  |    |
|----------------------------------------------------------------------------------------------------------------------------------------------------------------------------------|----|
| PARIS ECMO–COVID-19 INVESTIGATORS .....                                                                                                                                          | 2  |
| PARIS ECMO-COVID TASK FORCE.....                                                                                                                                                 | 4  |
| Statistical analysis plan .....                                                                                                                                                  | 5  |
| Table S1: Group statistics – multiple imputation – variables used in the multivariable analysis .....                                                                            | 9  |
| Table S2: Independent samples test of the Multiple Imputation data .....                                                                                                         | 26 |
| Table S3: ECMO consoles used.....                                                                                                                                                | 41 |
| Table S4: Characteristics of the ECMO centres.....                                                                                                                               | 41 |
| Table S5: Centre comparison on demographic, clinical, and ventilatory support characteristics of the patients’ overall and according to survival status 90 days after ECMO ..... | 42 |
| Figure S1: The four steps of the Greater Paris extracorporeal membrane oxygenation network organisation .....                                                                    | 45 |
| Figure S2: Principal component analysis (PCA) and correlation clustering.....                                                                                                    | 46 |
| Figure S3: Number of phone calls (n=575) requesting extracorporeal membrane oxygenation (23 March to 11 May 2020) .....                                                          | 47 |
| Figure S4: Map of the Greater Paris reporting the mobile extracorporeal membrane oxygenation team activity, and the number of hospitals where patients were cannulated.....      | 48 |
| Figure S5: Numbers of extracorporeal membrane oxygenation implantations and transfers for each mobile ECMO team (designated in the figure as A to F) .....                       | 49 |
| Figure S6: Random forest (RF) classified features .....                                                                                                                          | 50 |
| Figure S7: Boxplots of the features used in the random forest machine-learning algorithm...                                                                                      | 51 |
| Figure S8: Area under the curve (AUC) of receiving operating characteristic (ROC) curves.                                                                                        | 53 |
| Figure S9: Scatter plot for Age (A), orotracheal intubation-ECMO delay (B), symptoms-ECMO delay (C), and pre-ECMO plateau pressure (D) .....                                     | 54 |

## **PARIS ECMO–COVID-19 INVESTIGATORS**

### **Pitié-Salpêtrière hospital, Sorbonne University**

Charles Juvin MD, Thibault Schoell MD, Cosimo D’Alessandro MD, Sofica Marin MD, Nathalie Nardone MD, Pierre Demondion MD, Horacio Meyer MD, Karl Bounader MD, Alexander Moiroux, Ali Akamkam, Horacio Meyer, Guillaume Fadel, Erwan Randrianalisoa, Sebastien Cusquel, Patrice Le Gloahec, Elisabeth Hirschauer, Fabrice Musquet, Pierre-Marie Jego, Hélène Guedes, Théophile Roy, Lina Mercereau, Emmanuel Corvol, Anne Laboure, Flore Vilanove, Marco Peperoni, Dariène Machado, Aly Sely, Marion Fortanier, Séverine Gantois, Emilie Tran, Elisabeth Bosq, Aurélie Fontanier, Alice Morin, Jocelyne Cousin, Stéphanie Bovagnet, Charles Edouard Luyt MD, PhD, Guillaume Hekimian MD, Nicolas Brechot MD, PhD, Marc Pineton de Chambrun MD, PhD, Cyrielle Desnos MD, Juliette Chomeloux MD, Jeremy Arzoine MD, Emmanuelle Guerin MD, Antoine Monsel MD, PhD, Guillaume Voiriot, MD, PhD, David Levy, MD, PhD, Elodie Baron MD, PhD, Alexandra Beurton, Juliette Chommeloux, MD, Paris Meng MD, Safaa Nemlaghi MD, Pierre Bay MD, PhD, Alexandre Demoule MD, PhD, Bertrand Guidet MD, PhD, Jean Michel Constantin MD, PhD, Muriel Fartoukh MD, PhD, Martin Dres MD, PhD.

### **Bichat hospital**

Patrick Nataf, MD, PhD, Guillaume Franchineau, MD, Lucie Le Fevre, MD, Richard Raffoul MD, Soleiman Alkhoder MD, Walid Ghodbane MD, Angelo Pisani MD, Wael Braham MD, Bessem Gara Ali MD, Pierre Mordant MD, PhD, Yves-Hervé Castier MD, PhD, Etienne de Montmollin MD, Lila Bouadma MD, Jean-François Timsit MD.

### **Henri Mondor Hospital, Créteil**

Olivier Langeron, MD, PhD, Quentin de Roux MD, Claire Alessandri MD, Margot Arminot-Frémaux MD, Simon Clariot MD, Thomas Dessalle MD, Agathe Kudela MD, André Ly MD, Arnaud Meffert MD, Elena Skripkina MD, Antonio Fiore MD, Costin Radu MD.

### **European Hospital Georges Pompidou**

Eleonora Dupuy-Montbrun, MD, Christian Latremouille, MD, PhD.

### **Marie-Lannelongue Hospital, Le Plessis-Robinson, France**

François Stephan, MD, PhD, Olaf Mercier, MD, PhD, Philippe Deleuze MD, PhD.

### **Kremlin-Bicêtre University Hospital**

Jacques Duranteau MD, PhD, Christian Richard MD, PhD, Marie Werner, MD, Jean-Louis Teboul MD, PhD, Xavier Monnet, MD, PhD.

### **Institut Mutualiste Montsouris, Paris, France**

Hassan Debbagh MD.

### **Foch Hospital, Suresnes, France**

Alain Chapelier MD, PhD, Julien De Wolf MD, Matthieu Glorion MD, Ciprian Pricopi MD, Francesco Cassiano MD, Sébastien Jacquemin MD, Guillaume Tachon MD, François Parquin, Benjamin Zuber.

### **Lariboisière Hospital, APHP, Paris, France**

Sébastien Voicu, Nicolas Deye, Isabelle Malissin, Laetitia Sutterlin, Giulia Naim, Adrien Pépin-Lehalleur, Aymen Mrad, Jean-Michel Ekhérian, Philippe Nguyen, Georgios Sidéris, Dominique Vodovar, Caroline Grant, Mattéo Arcelli, Alban Copie, Zaccaria Errabih, Antoine

Gonde, Adèle Magalhaes Adèle, Edouard Meurisse, Kiyoko Nitenberg, Arthur Perault, Lucile Perrin, Maxime Renaux.

**Cochin Hospital, APHP, Paris, France**

Alain Carriou, MD, PhD, Jean-Paul Mira, MD, PhD, Julien Charpentier MD, PhD, Frederic Pene MD, PhD, Lee Nguyen MD.

**Grand Hôpital du Sud Francilien, Corbeil, France**

Sophie Marqué, MD, Luis Ensenyat-Martin MD.

**Grand Hôpital de l'Est Francilien, Jossigny, France**

Eric Delpierre MD, Matthieu Duprey MD.

**Hôpital Delafontaine, Saint Denis, France**

Daniel da Silva MD, Bruno Verdière MD.

**Jacques Cartier Hospital, Massy, France**

Julien Amour, MD, PhD, Marina Clément, MD.

**Centre Cardiologique du Nord, Saint-Denis, France**

Yves Ollivier MD, Tristan Morichau-Beauchant MD, Fabrice Daviaud MD.

**Louis Mourier Hospital, APHP, Colombes, France**

C. Le Breton, MD, S. Freitas-Ramos, MD, M. Amouretti, MD, P.A. Billiet, MD, M. Dao, MD, L.M. Dumont, MD, L. Federici, MD, B. Gaborieau, MD, P. Postel-Vinay, MD, C. Vuillard, MD, N. Zucman, MD, D. Dreyfuss, MD, J.D. Ricard, MD, PhD, D. Roux, MD, PhD.

## **PARIS ECMO-COVID TASK FORCE**

Alain Combes, MD, PhD. Service de médecine intensive réanimation. Hôpital de La Pitié Salpêtrière, Sorbonne Université. Paris, France.

Bernard Cholley, MD, PhD. Service d'Anesthésie Réanimation. Hôpital Européen Georges Pompidou, Université de Paris. Paris, France.

Thierry Folliguet, MD, PhD. Service de chirurgie Cardiaque. Hôpital Henri-Mondor, Université Paris Est. Créteil, France.

Julien Guihaire, MD, PhD. Service de chirurgie Cardiovasculaire. Centre Medico-Chirurgical Marie-Lannelongue. Sorbonne Université. Le Plessis-Robinson, France.

Emmanuel Lansac, MD, PhD. Service de chirurgie Cardiaque. Institut Mutualiste Montsouris. Paris, France.

Guillaume Lebreton, MD, PhD. Service de chirurgie Thoracique et Cardiovasculaire. Hôpital de La Pitié Salpêtrière, Sorbonne Université. Paris, France.

Pascal Leprince, MD, PhD. Service de chirurgie Thoracique et Cardiovasculaire. Hôpital de La Pitié Salpêtrière, Sorbonne Université. Paris, France.

Dan Longrois, MD, PhD. Service d'Anesthésie Réanimation. Hôpital Bichat, Université de Paris. Paris, France.

Bruno Mégarbane, MD, PhD. Réanimation Médicale et Toxicologique, Hôpital Lariboisière, Université Paris. Paris, France

Patrick Nataf, MD, PhD. Service de chirurgie Cardiovasculaire. Hôpital Bichat, Université de Paris. Paris, France.

Marylou Para, MD. Service de chirurgie Cardiovasculaire. Hôpital Bichat, Université de Paris. Paris, France.

Edouard Sage, MD, PhD. Service de chirurgie Thoracique. Hôpital Foch. Suresnes, France.

Matthieu Schmidt, MD, PhD. Service de médecine intensive réanimation. Hôpital de La Pitié Salpêtrière, Sorbonne Université. Paris, France.

Romain Sonnevile, MD, PhD. Service de médecine intensive réanimation. Hôpital Bichat, Université de Paris. Paris, France.

## **Statistical analysis plan**

This work reports a multicenter cohort study on ECMO network organization and outcomes during the first wave of the COVID-19 pandemic. The aim of the report is to describe the characteristics, ECMO managements and the outcomes of COVID-19 patients and to determine the prognostic variables for survival at the 90-days after ECMO.

### **Schematic representation**

A schematic representation will be presented to depict the Organization of the Greater Paris ECMO network during the COVID-19 pandemic (8 March and 3 June 2020).

### **Descriptive analysis**

Patient's characteristics will be described as frequencies and percentages for categorical variables and as means and standard deviations or medians and interquartile ranges for quantitative variables. Categorical variables will be compared by Chi-square or Fisher's exact test, and continuous variables will be compared by Student's t test or Wilcoxon's rank-sum test based on the normality test by Shapiro-Wilk test.

Kaplan–Meier overall survival curves until Day 90 will be computed using the log-rank tests.

### **Multivariable analysis**

Multivariable analysis to identify independent variables associated with 90-day survival after ECMO will be performed using logistic regression model, using backward step-wise conditional method. Variables selected a priori for the multivariable model based on the literature in the ECMO and COVID-19 fields include, Age, BMI, time between intubation and ECMO, Time between first symptoms and ECMO, Number of all ECMO in the previous year,

Number of VV-ECMO in the previous year, Pre-ECMO Renal component of the SOFA, Pre-ECMO Liver component of the SOFA score, Pre-ECMO High-dose corticosteroids, Diabetes, Hypertension, Immunocompromised status, Cannulation by a mobile ECMO team, Pre-ECMO neuromuscular blockade, Pre-ECMO PaCO<sub>2</sub>, Pre-ECMO Plateau pressure , Pre-ECMO Prone positioning, Pre-ECMO cardiovascular component of the SOFA score, Pre-ECMO PaO<sub>2</sub>/FiO<sub>2</sub>. No variable selection will be performed.

VV-ECMO done on the previous year will be categorized into two groups based on the literature <sup>(1)</sup>; <30 and >30 VV-ECMO. Variables such as age, time between intubation and ECMO will be tertiled to better visualize in Kaplan-Meier plot, their impact on the survival.

The results of the Multivariable analysis will be expressed as odds ratios (ORs) with 95% confidence intervals (CIs), together with the p values. The goodness of the overall fit of the model will be validated by Omnibus tests of model coefficients at the 5% level of significance and ROC analysis.

### **Multiple imputation of the missing values**

Multiple-imputation analyses will be performed with linear regression method for quantitative variables and logistic regression for categorical variables. We will compare the imputed values with the observed values to establish the validity of the imputed data. The imputation will be repeated 10 times and Rubin's rule <sup>(2)</sup> will be used to combine variable estimates and standard errors. Sensitivity analysis will be performed to evaluate the robustness of our findings in terms of missing data.

The variables that will be used for the multiple imputation analysis will comprise, Age, BMI, time between intubation and ECMO, Time between first symptoms and ECMO, Number of all ECMO in the previous year, Number of VV-ECMO in the previous year, Pre-ECMO Renal

component of the SOFA, Pre-ECMO Liver component of the SOFA score, Pre-ECMO High-dose corticosteroids, Diabetes, Hypertension, Immunocompromised status, Cannulation by a mobile ECMO team, Pre-ECMO neuromuscular blockade, Pre-ECMO PaCO<sub>2</sub>, Pre-ECMO Plateau pressure, Pre-ECMO Prone positioning, Pre-ECMO cardiovascular component of the SOFA score, Pre-ECMO PaO<sub>2</sub>/FiO<sub>2</sub>.

### **Machine-learning approach**

The popular machine-learning algorithm, 'Random Forest (RF)', will be used to validate our results of conventional model. RF is an ensemble-based technique that aims to minimize the limitations of classical decision trees by building multiple trees from a random subset of the original training data and considering only a random number of predictor variables at each split, instead of trying all the variables at every split, before aggregating their results <sup>(3)(4)</sup>. RF is more robust to overfitting than other normal decision trees and promises a good predictive performance. RF runs quite efficiently on large datasets; categorical and continuous. At least 5000 random trees will be set in our analysis. The top features ranked by their contributions to classification accuracy (Mean Decrease Accuracy) will be compared to the results obtained by conventional model.

### **Principal component analysis (PCA)**

PCA is a mathematical algorithm that reduces the dimensionality of the data, by the transformation of larger variable sets into small sets that retain most of the information in the large set. In a simpler term, PCA reduces the dimensionality of large datasets, thereby increases the interpretability, while simultaneously minimizing information loss. The first principal component (PC) explains the highest variability in the data and each of the succeeding PC accounts for the remaining variability in the dataset <sup>(5)</sup>. To form each



additional PC, it seeks out a second linear combination that can explain the maximum of the remaining variance. Variable loadings; variables that contributes for the variance for each PCs will be obtained. PCA is more a descriptive tool, rather than predictive, but partly can validate or explain the predicted findings. The loadings of the PCA will then be clustered by Pearson correlation to better depict the findings.

### **Statistical software**

Descriptive, univariate, and multivariable analysis will be performed using SPSS software v26.0. Random forest, PCA, correlation network will be made using the R 3.5.3; packages include corrPlot, randomForest, and MetaboAnalystR.

### **References:**

1. Barbaro RP, Odetola FO, Kidwell KM, et al. Association of hospital-level volume of extracorporeal membrane oxygenation cases and mortality. Analysis of the extracorporeal life support organization registry. *Am J Respir Crit Care Med.* 2015; 191:894-901.
2. White IR, Royston P, Wood AM. Multiple imputation using chained equations: Issues and guidance for practice. *Stat Med* 2011 February 20; 30(4):377-399.
3. Breiman L. Random Forests. *Machine Learning* 2001 Oct; 45(1):5-32.
4. Boulesteix A, Janitza S, Kruppa J, König IR. Overview of random forest methodology and practical guidance with emphasis on computational biology and bioinformatics. *WIREs Data Mining Knowl Discov* 2012 November 1; 2(6):493-507.
5. Jolliffe Ian T. and Cadima Jorge. Principal component analysis: a review and recent developments. *Phil. Trans. R. Soc. A.* 2016 (374):20150202

**Table S1: Group statistics – multiple imputation – variables used in the multivariable analysis**

Multiple-imputation analyses were done with linear regression method for quantitative variables and logistic regression for categorical variables. Variables entered in the model were selected a priori based on the literature in the ECMO and COVID-19 fields. Variables used in the model regardless of their p value include, Pre-ECMO High-dose corticosteroids, Diabetes, Hypertension, Immunocompromised, Mobile ECMO Transfer, Neuromuscular blockade, Pre-ECMO PaCO<sub>2</sub>, Pre-ECMO Plateau pressure, Pre-ECMO Prone positioning, Pre-ECMO Liver component of the SOFA score, Pre-ECMO VAC component of the SOFA score, Pre-ECMO PaO<sub>2</sub>/FiO<sub>2</sub>.

| Imputation Number |                        |       | N    | Mean    | Std. Deviation | Std. Error Mean | Fraction Missing Info. | Relative Increase Variance | Relative Efficiency |
|-------------------|------------------------|-------|------|---------|----------------|-----------------|------------------------|----------------------------|---------------------|
| Original data     | All ECMO previous year | Dead  | 164  | 83,290  | 93,699         | 7,317           |                        |                            |                     |
|                   |                        | Alive | 138  | 117,600 | 130,413        | 11,102          |                        |                            |                     |
|                   | VV-ECMO previous year  | Dead  | 164  | 20,744  | 21,583         | 1,685           |                        |                            |                     |
|                   |                        | Alive | 138  | 29,877  | 26,426         | 2,250           |                        |                            |                     |
|                   | Age                    | Dead  | 164  | 52,965  | 8,618          | 0,673           |                        |                            |                     |
|                   |                        | Alive | 138  | 48,569  | 10,582         | 0,901           |                        |                            |                     |
|                   | BMI                    | Dead  | 160  | 30,594  | 5,592          | 0,442           |                        |                            |                     |
|                   |                        | Alive | 136  | 30,722  | 6,213          | 0,533           |                        |                            |                     |
|                   | Hypertension           | Dead  | 164  | 0,360   | 0,481          | 0,038           |                        |                            |                     |
|                   |                        | Alive | 138  | 0,319   | 0,468          | 0,040           |                        |                            |                     |
|                   | Diabetes               | Dead  | 164  | 0,317   | 0,467          | 0,036           |                        |                            |                     |
|                   |                        | Alive | 138  | 0,254   | 0,437          | 0,037           |                        |                            |                     |
|                   | Immunocompromised      | Dead  | 164  | 0,079   | 0,271          | 0,021           |                        |                            |                     |
|                   |                        | Alive | 138  | 0,036   | 0,188          | 0,016           |                        |                            |                     |
|                   | Symptoms - ECMO delay  | Dead  | 159  | 15,547  | 6,878          | 0,545           |                        |                            |                     |
|                   |                        | Alive | 136  | 13,647  | 5,305          | 0,455           |                        |                            |                     |
|                   |                        |       | Dead | 164     | 5,866          | 4,078           | 0,318                  |                            |                     |

|     |                                               |       |        |         |         |        |  |  |  |
|-----|-----------------------------------------------|-------|--------|---------|---------|--------|--|--|--|
|     | Orotracheal intubation - ECMO delay           | Alive | 138    | 4,268   | 3,241   | 0,276  |  |  |  |
|     | Mobile ECMO Transfer                          | Dead  | 164    | 0,348   | 0,478   | 0,037  |  |  |  |
|     |                                               | Alive | 137    | 0,409   | 0,493   | 0,042  |  |  |  |
|     | Pre-ECMO Cardiovascular component of the SOFA | Dead  | 156    | 2,237   | 1,719   | 0,138  |  |  |  |
|     |                                               | Alive | 128    | 2,102   | 1,822   | 0,161  |  |  |  |
|     | Pre-ECMO Liver component of the SOFA          | Dead  | 155    | 0,555   | 0,948   | 0,076  |  |  |  |
|     |                                               | Alive | 129    | 0,372   | 0,674   | 0,059  |  |  |  |
|     | Pre-ECMO Renal component of the SOFA          | Dead  | 156    | 1,372   | 1,583   | 0,127  |  |  |  |
|     |                                               | Alive | 129    | 0,667   | 1,277   | 0,112  |  |  |  |
|     | Pre-ECMO Plateau pressure                     | Dead  | 135    | 30,615  | 6,340   | 0,546  |  |  |  |
|     |                                               | Alive | 117    | 30,034  | 4,878   | 0,451  |  |  |  |
|     | Pre-ECMO paCO2                                | Dead  | 154    | 59,500  | 16,579  | 1,336  |  |  |  |
|     |                                               | Alive | 132    | 56,462  | 14,781  | 1,286  |  |  |  |
|     | Pre-ECMO paO2/FiO2                            | Dead  | 158    | 64,525  | 17,801  | 1,416  |  |  |  |
|     |                                               | Alive | 136    | 63,426  | 16,896  | 1,449  |  |  |  |
|     | Pre-ECMO Prone positioning                    | Dead  | 164    | 0,945   | 0,228   | 0,018  |  |  |  |
|     |                                               | Alive | 138    | 0,942   | 0,235   | 0,020  |  |  |  |
|     | Pre-ECMO Neuromuscular blockade               | Dead  | 164    | 0,982   | 0,134   | 0,010  |  |  |  |
|     |                                               | Alive | 138    | 0,942   | 0,235   | 0,020  |  |  |  |
|     | Pre-ECMO High-dose corticosteroids            | Dead  | 164    | 0,189   | 0,393   | 0,031  |  |  |  |
|     |                                               | Alive | 138    | 0,217   | 0,414   | 0,035  |  |  |  |
| 1   | All ECMO previous year                        | Dead  | 164    | 83,290  | 93,699  | 7,317  |  |  |  |
|     |                                               | Alive | 138    | 117,600 | 130,413 | 11,102 |  |  |  |
|     | VV-ECMO previous year                         | Dead  | 164    | 20,744  | 21,583  | 1,685  |  |  |  |
|     |                                               | Alive | 138    | 29,877  | 26,426  | 2,250  |  |  |  |
|     | Age                                           | Dead  | 164    | 52,965  | 8,618   | 0,673  |  |  |  |
|     |                                               | Alive | 138    | 48,569  | 10,582  | 0,901  |  |  |  |
| BMI | Dead                                          | 164   | 30,456 | 5,616   | 0,439   |        |  |  |  |

|                                               |       |     |        |        |       |  |  |  |
|-----------------------------------------------|-------|-----|--------|--------|-------|--|--|--|
|                                               | Alive | 138 | 30,708 | 6,184  | 0,526 |  |  |  |
| Hypertension                                  | Dead  | 164 | 0,360  | 0,481  | 0,038 |  |  |  |
|                                               | Alive | 138 | 0,319  | 0,468  | 0,040 |  |  |  |
| Diabetes                                      | Dead  | 164 | 0,317  | 0,467  | 0,036 |  |  |  |
|                                               | Alive | 138 | 0,254  | 0,437  | 0,037 |  |  |  |
| Immunocompromised                             | Dead  | 164 | 0,079  | 0,271  | 0,021 |  |  |  |
|                                               | Alive | 138 | 0,036  | 0,188  | 0,016 |  |  |  |
| Symptoms - ECMO delay                         | Dead  | 164 | 15,640 | 6,813  | 0,532 |  |  |  |
|                                               | Alive | 138 | 13,607 | 5,320  | 0,453 |  |  |  |
| Orotracheal intubation - ECMO delay           | Dead  | 164 | 5,866  | 4,078  | 0,318 |  |  |  |
|                                               | Alive | 138 | 4,268  | 3,241  | 0,276 |  |  |  |
| Mobile ECMO Transfer                          | Dead  | 164 | 0,348  | 0,478  | 0,037 |  |  |  |
|                                               | Alive | 138 | 0,406  | 0,493  | 0,042 |  |  |  |
| Pre-ECMO Cardiovascular component of the SOFA | Dead  | 164 | 2,232  | 1,714  | 0,134 |  |  |  |
|                                               | Alive | 138 | 2,062  | 1,823  | 0,155 |  |  |  |
| Pre-ECMO Liver component of the SOFA          | Dead  | 164 | 0,502  | 0,972  | 0,076 |  |  |  |
|                                               | Alive | 138 | 0,355  | 0,675  | 0,057 |  |  |  |
| Pre-ECMO Renal component of the SOFA          | Dead  | 164 | 1,396  | 1,550  | 0,121 |  |  |  |
|                                               | Alive | 138 | 0,691  | 1,350  | 0,115 |  |  |  |
| Pre-ECMO Plateau pressure                     | Dead  | 164 | 30,869 | 6,227  | 0,486 |  |  |  |
|                                               | Alive | 138 | 30,150 | 5,179  | 0,441 |  |  |  |
| Pre-ECMO paCO2                                | Dead  | 164 | 59,322 | 16,292 | 1,272 |  |  |  |
|                                               | Alive | 138 | 56,974 | 15,025 | 1,279 |  |  |  |
| Pre-ECMO paO2/FiO2                            | Dead  | 164 | 63,779 | 17,947 | 1,401 |  |  |  |
|                                               | Alive | 138 | 63,540 | 16,826 | 1,432 |  |  |  |
| Pre-ECMO Prone positioning                    | Dead  | 164 | 0,945  | 0,228  | 0,018 |  |  |  |
|                                               | Alive | 138 | 0,942  | 0,235  | 0,020 |  |  |  |
| Pre-ECMO Neuromuscular blockade               | Dead  | 164 | 0,982  | 0,134  | 0,010 |  |  |  |
|                                               | Alive | 138 | 0,942  | 0,235  | 0,020 |  |  |  |

|                                      |                                               |       |       |         |         |        |  |  |  |
|--------------------------------------|-----------------------------------------------|-------|-------|---------|---------|--------|--|--|--|
|                                      | Pre-ECMO High-dose corticosteroids            | Dead  | 164   | 0,189   | 0,393   | 0,031  |  |  |  |
|                                      |                                               | Alive | 138   | 0,217   | 0,414   | 0,035  |  |  |  |
| 2                                    | All ECMO previous year                        | Dead  | 164   | 83,290  | 93,699  | 7,317  |  |  |  |
|                                      |                                               | Alive | 138   | 117,600 | 130,413 | 11,102 |  |  |  |
|                                      | VV-ECMO previous year                         | Dead  | 164   | 20,744  | 21,583  | 1,685  |  |  |  |
|                                      |                                               | Alive | 138   | 29,877  | 26,426  | 2,250  |  |  |  |
|                                      | Age                                           | Dead  | 164   | 52,965  | 8,618   | 0,673  |  |  |  |
|                                      |                                               | Alive | 138   | 48,569  | 10,582  | 0,901  |  |  |  |
|                                      | BMI                                           | Dead  | 164   | 30,561  | 5,687   | 0,444  |  |  |  |
|                                      |                                               | Alive | 138   | 30,720  | 6,167   | 0,525  |  |  |  |
|                                      | Hypertension                                  | Dead  | 164   | 0,360   | 0,481   | 0,038  |  |  |  |
|                                      |                                               | Alive | 138   | 0,319   | 0,468   | 0,040  |  |  |  |
|                                      | Diabetes                                      | Dead  | 164   | 0,317   | 0,467   | 0,036  |  |  |  |
|                                      |                                               | Alive | 138   | 0,254   | 0,437   | 0,037  |  |  |  |
|                                      | Immunocompromised                             | Dead  | 164   | 0,079   | 0,271   | 0,021  |  |  |  |
|                                      |                                               | Alive | 138   | 0,036   | 0,188   | 0,016  |  |  |  |
|                                      | Symptoms - ECMO delay                         | Dead  | 164   | 15,672  | 6,957   | 0,543  |  |  |  |
|                                      |                                               | Alive | 138   | 13,639  | 5,267   | 0,448  |  |  |  |
|                                      | Orotracheal intubation - ECMO delay           | Dead  | 164   | 5,866   | 4,078   | 0,318  |  |  |  |
|                                      |                                               | Alive | 138   | 4,268   | 3,241   | 0,276  |  |  |  |
|                                      | Mobile ECMO Transfer                          | Dead  | 164   | 0,348   | 0,478   | 0,037  |  |  |  |
|                                      |                                               | Alive | 138   | 0,406   | 0,493   | 0,042  |  |  |  |
|                                      | Pre-ECMO Cardiovascular component of the SOFA | Dead  | 164   | 2,243   | 1,703   | 0,133  |  |  |  |
|                                      |                                               | Alive | 138   | 2,114   | 1,787   | 0,152  |  |  |  |
|                                      | Pre-ECMO Liver component of the SOFA          | Dead  | 164   | 0,562   | 0,955   | 0,075  |  |  |  |
|                                      |                                               | Alive | 138   | 0,356   | 0,694   | 0,059  |  |  |  |
| Pre-ECMO Renal component of the SOFA | Dead                                          | 164   | 1,363 | 1,592   | 0,124   |        |  |  |  |
|                                      | Alive                                         | 138   | 0,673 | 1,288   | 0,110   |        |  |  |  |
|                                      |                                               | Dead  | 164   | 30,599  | 6,065   | 0,474  |  |  |  |

|   |                                    |       |      |         |         |        |       |  |  |  |
|---|------------------------------------|-------|------|---------|---------|--------|-------|--|--|--|
|   | Pre-ECMO Plateau pressure          | Alive | 138  | 30,178  | 4,783   | 0,407  |       |  |  |  |
|   | Pre-ECMO paCO2                     | Dead  | 164  | 59,005  | 16,539  | 1,291  |       |  |  |  |
|   |                                    | Alive | 138  | 56,807  | 14,966  | 1,274  |       |  |  |  |
|   | Pre-ECMO paO2/FiO2                 | Dead  | 164  | 64,521  | 17,579  | 1,373  |       |  |  |  |
|   |                                    | Alive | 138  | 63,075  | 17,034  | 1,450  |       |  |  |  |
|   | Pre-ECMO Prone positioning         | Dead  | 164  | 0,945   | 0,228   | 0,018  |       |  |  |  |
|   |                                    | Alive | 138  | 0,942   | 0,235   | 0,020  |       |  |  |  |
|   | Pre-ECMO Neuromuscular blockade    | Dead  | 164  | 0,982   | 0,134   | 0,010  |       |  |  |  |
|   |                                    | Alive | 138  | 0,942   | 0,235   | 0,020  |       |  |  |  |
|   | Pre-ECMO High-dose corticosteroids | Dead  | 164  | 0,189   | 0,393   | 0,031  |       |  |  |  |
|   |                                    | Alive | 138  | 0,217   | 0,414   | 0,035  |       |  |  |  |
| 3 | All ECMO previous year             | Dead  | 164  | 83,290  | 93,699  | 7,317  |       |  |  |  |
|   |                                    | Alive | 138  | 117,600 | 130,413 | 11,102 |       |  |  |  |
|   | VV-ECMO previous year              | Dead  | 164  | 20,744  | 21,583  | 1,685  |       |  |  |  |
|   |                                    | Alive | 138  | 29,877  | 26,426  | 2,250  |       |  |  |  |
|   | Age                                | Dead  | 164  | 52,965  | 8,618   | 0,673  |       |  |  |  |
|   |                                    | Alive | 138  | 48,569  | 10,582  | 0,901  |       |  |  |  |
|   | BMI                                | Dead  | 164  | 30,477  | 5,624   | 0,439  |       |  |  |  |
|   |                                    | Alive | 138  | 30,635  | 6,214   | 0,529  |       |  |  |  |
|   | Hypertension                       | Dead  | 164  | 0,360   | 0,481   | 0,038  |       |  |  |  |
|   |                                    | Alive | 138  | 0,319   | 0,468   | 0,040  |       |  |  |  |
|   | Diabetes                           | Dead  | 164  | 0,317   | 0,467   | 0,036  |       |  |  |  |
|   |                                    | Alive | 138  | 0,254   | 0,437   | 0,037  |       |  |  |  |
|   | Immunocompromised                  | Dead  | 164  | 0,079   | 0,271   | 0,021  |       |  |  |  |
|   |                                    | Alive | 138  | 0,036   | 0,188   | 0,016  |       |  |  |  |
|   | Symptoms - ECMO delay              | Dead  | 164  | 15,713  | 6,887   | 0,538  |       |  |  |  |
|   |                                    | Alive | 138  | 13,658  | 5,389   | 0,459  |       |  |  |  |
|   |                                    |       | Dead | 164     | 5,866   | 4,078  | 0,318 |  |  |  |

|     |                                               |       |        |         |         |        |  |  |  |
|-----|-----------------------------------------------|-------|--------|---------|---------|--------|--|--|--|
|     | Orotracheal intubation - ECMO delay           | Alive | 138    | 4,268   | 3,241   | 0,276  |  |  |  |
|     | Mobile ECMO Transfer                          | Dead  | 164    | 0,348   | 0,478   | 0,037  |  |  |  |
|     |                                               | Alive | 138    | 0,406   | 0,493   | 0,042  |  |  |  |
|     | Pre-ECMO Cardiovascular component of the SOFA | Dead  | 164    | 2,221   | 1,736   | 0,136  |  |  |  |
|     |                                               | Alive | 138    | 2,137   | 1,817   | 0,155  |  |  |  |
|     | Pre-ECMO Liver component of the SOFA          | Dead  | 164    | 0,523   | 0,982   | 0,077  |  |  |  |
|     |                                               | Alive | 138    | 0,396   | 0,665   | 0,057  |  |  |  |
|     | Pre-ECMO Renal component of the SOFA          | Dead  | 164    | 1,351   | 1,560   | 0,122  |  |  |  |
|     |                                               | Alive | 138    | 0,712   | 1,314   | 0,112  |  |  |  |
|     | Pre-ECMO Plateau pressure                     | Dead  | 164    | 30,711  | 6,505   | 0,508  |  |  |  |
|     |                                               | Alive | 138    | 30,042  | 5,087   | 0,433  |  |  |  |
|     | Pre-ECMO paCO2                                | Dead  | 164    | 59,963  | 16,382  | 1,279  |  |  |  |
|     |                                               | Alive | 138    | 56,466  | 14,645  | 1,247  |  |  |  |
|     | Pre-ECMO paO2/FiO2                            | Dead  | 164    | 64,040  | 17,975  | 1,404  |  |  |  |
|     |                                               | Alive | 138    | 63,222  | 17,020  | 1,449  |  |  |  |
|     | Pre-ECMO Prone positioning                    | Dead  | 164    | 0,945   | 0,228   | 0,018  |  |  |  |
|     |                                               | Alive | 138    | 0,942   | 0,235   | 0,020  |  |  |  |
|     | Pre-ECMO Neuromuscular blockade               | Dead  | 164    | 0,982   | 0,134   | 0,010  |  |  |  |
|     |                                               | Alive | 138    | 0,942   | 0,235   | 0,020  |  |  |  |
|     | Pre-ECMO High-dose corticosteroids            | Dead  | 164    | 0,189   | 0,393   | 0,031  |  |  |  |
|     |                                               | Alive | 138    | 0,217   | 0,414   | 0,035  |  |  |  |
| 4   | All ECMO previous year                        | Dead  | 164    | 83,290  | 93,699  | 7,317  |  |  |  |
|     |                                               | Alive | 138    | 117,600 | 130,413 | 11,102 |  |  |  |
|     | VV-ECMO previous year                         | Dead  | 164    | 20,744  | 21,583  | 1,685  |  |  |  |
|     |                                               | Alive | 138    | 29,877  | 26,426  | 2,250  |  |  |  |
|     | Age                                           | Dead  | 164    | 52,965  | 8,618   | 0,673  |  |  |  |
|     |                                               | Alive | 138    | 48,569  | 10,582  | 0,901  |  |  |  |
| BMI | Dead                                          | 164   | 30,537 | 5,563   | 0,434   |        |  |  |  |

|                                               |       |     |        |        |       |  |  |  |
|-----------------------------------------------|-------|-----|--------|--------|-------|--|--|--|
|                                               | Alive | 138 | 30,774 | 6,182  | 0,526 |  |  |  |
| Hypertension                                  | Dead  | 164 | 0,360  | 0,481  | 0,038 |  |  |  |
|                                               | Alive | 138 | 0,319  | 0,468  | 0,040 |  |  |  |
| Diabetes                                      | Dead  | 164 | 0,317  | 0,467  | 0,036 |  |  |  |
|                                               | Alive | 138 | 0,254  | 0,437  | 0,037 |  |  |  |
| Immunocompromised                             | Dead  | 164 | 0,079  | 0,271  | 0,021 |  |  |  |
|                                               | Alive | 138 | 0,036  | 0,188  | 0,016 |  |  |  |
| Symptoms - ECMO delay                         | Dead  | 164 | 15,602 | 6,920  | 0,540 |  |  |  |
|                                               | Alive | 138 | 13,655 | 5,281  | 0,450 |  |  |  |
| Orotracheal intubation - ECMO delay           | Dead  | 164 | 5,866  | 4,078  | 0,318 |  |  |  |
|                                               | Alive | 138 | 4,268  | 3,241  | 0,276 |  |  |  |
| Mobile ECMO Transfer                          | Dead  | 164 | 0,348  | 0,478  | 0,037 |  |  |  |
|                                               | Alive | 138 | 0,413  | 0,494  | 0,042 |  |  |  |
| Pre-ECMO Cardiovascular component of the SOFA | Dead  | 164 | 2,202  | 1,752  | 0,137 |  |  |  |
|                                               | Alive | 138 | 2,125  | 1,858  | 0,158 |  |  |  |
| Pre-ECMO Liver component of the SOFA          | Dead  | 164 | 0,541  | 0,942  | 0,074 |  |  |  |
|                                               | Alive | 138 | 0,375  | 0,719  | 0,061 |  |  |  |
| Pre-ECMO Renal component of the SOFA          | Dead  | 164 | 1,338  | 1,578  | 0,123 |  |  |  |
|                                               | Alive | 138 | 0,717  | 1,312  | 0,112 |  |  |  |
| Pre-ECMO Plateau pressure                     | Dead  | 164 | 30,706 | 6,193  | 0,484 |  |  |  |
|                                               | Alive | 138 | 30,366 | 5,128  | 0,437 |  |  |  |
| Pre-ECMO paCO2                                | Dead  | 164 | 59,830 | 16,550 | 1,292 |  |  |  |
|                                               | Alive | 138 | 56,670 | 14,742 | 1,255 |  |  |  |
| Pre-ECMO paO2/FiO2                            | Dead  | 164 | 64,898 | 17,754 | 1,386 |  |  |  |
|                                               | Alive | 138 | 63,576 | 16,845 | 1,434 |  |  |  |
| Pre-ECMO Prone positioning                    | Dead  | 164 | 0,945  | 0,228  | 0,018 |  |  |  |
|                                               | Alive | 138 | 0,942  | 0,235  | 0,020 |  |  |  |
| Pre-ECMO Neuromuscular blockade               | Dead  | 164 | 0,982  | 0,134  | 0,010 |  |  |  |
|                                               | Alive | 138 | 0,942  | 0,235  | 0,020 |  |  |  |



|                                               |                                    |       |     |         |         |        |  |  |  |
|-----------------------------------------------|------------------------------------|-------|-----|---------|---------|--------|--|--|--|
|                                               | Pre-ECMO High-dose corticosteroids | Dead  | 164 | 0,189   | 0,393   | 0,031  |  |  |  |
|                                               |                                    | Alive | 138 | 0,217   | 0,414   | 0,035  |  |  |  |
| 5                                             | All ECMO previous year             | Dead  | 164 | 83,290  | 93,699  | 7,317  |  |  |  |
|                                               |                                    | Alive | 138 | 117,600 | 130,413 | 11,102 |  |  |  |
|                                               | VV-ECMO previous year              | Dead  | 164 | 20,744  | 21,583  | 1,685  |  |  |  |
|                                               |                                    | Alive | 138 | 29,877  | 26,426  | 2,250  |  |  |  |
| Age                                           |                                    | Dead  | 164 | 52,965  | 8,618   | 0,673  |  |  |  |
|                                               |                                    | Alive | 138 | 48,569  | 10,582  | 0,901  |  |  |  |
| BMI                                           |                                    | Dead  | 164 | 30,544  | 5,582   | 0,436  |  |  |  |
|                                               |                                    | Alive | 138 | 30,685  | 6,207   | 0,528  |  |  |  |
| Hypertension                                  |                                    | Dead  | 164 | 0,360   | 0,481   | 0,038  |  |  |  |
|                                               |                                    | Alive | 138 | 0,319   | 0,468   | 0,040  |  |  |  |
| Diabetes                                      |                                    | Dead  | 164 | 0,317   | 0,467   | 0,036  |  |  |  |
|                                               |                                    | Alive | 138 | 0,254   | 0,437   | 0,037  |  |  |  |
| Immunocompromised                             |                                    | Dead  | 164 | 0,079   | 0,271   | 0,021  |  |  |  |
|                                               |                                    | Alive | 138 | 0,036   | 0,188   | 0,016  |  |  |  |
| Symptoms - ECMO delay                         |                                    | Dead  | 164 | 15,618  | 6,860   | 0,536  |  |  |  |
|                                               |                                    | Alive | 138 | 13,654  | 5,286   | 0,450  |  |  |  |
| Orotracheal intubation - ECMO delay           |                                    | Dead  | 164 | 5,866   | 4,078   | 0,318  |  |  |  |
|                                               |                                    | Alive | 138 | 4,268   | 3,241   | 0,276  |  |  |  |
| Mobile ECMO Transfer                          |                                    | Dead  | 164 | 0,348   | 0,478   | 0,037  |  |  |  |
|                                               |                                    | Alive | 138 | 0,406   | 0,493   | 0,042  |  |  |  |
| Pre-ECMO Cardiovascular component of the SOFA |                                    | Dead  | 164 | 2,263   | 1,729   | 0,135  |  |  |  |
|                                               |                                    | Alive | 138 | 2,193   | 1,915   | 0,163  |  |  |  |
| Pre-ECMO Liver component of the SOFA          |                                    | Dead  | 164 | 0,526   | 0,969   | 0,076  |  |  |  |
|                                               |                                    | Alive | 138 | 0,342   | 0,721   | 0,061  |  |  |  |
| Pre-ECMO Renal component of the SOFA          |                                    | Dead  | 164 | 1,318   | 1,627   | 0,127  |  |  |  |
|                                               |                                    | Alive | 138 | 0,680   | 1,257   | 0,107  |  |  |  |
|                                               |                                    | Dead  | 164 | 30,475  | 6,132   | 0,479  |  |  |  |

|   |                                    |       |      |         |         |        |       |  |  |  |
|---|------------------------------------|-------|------|---------|---------|--------|-------|--|--|--|
|   | Pre-ECMO Plateau pressure          | Alive | 138  | 30,169  | 5,111   | 0,435  |       |  |  |  |
|   | Pre-ECMO paCO2                     | Dead  | 164  | 60,126  | 16,435  | 1,283  |       |  |  |  |
|   |                                    | Alive | 138  | 56,962  | 14,905  | 1,269  |       |  |  |  |
|   | Pre-ECMO paO2/FiO2                 | Dead  | 164  | 64,472  | 17,674  | 1,380  |       |  |  |  |
|   |                                    | Alive | 138  | 63,640  | 17,099  | 1,456  |       |  |  |  |
|   | Pre-ECMO Prone positioning         | Dead  | 164  | 0,945   | 0,228   | 0,018  |       |  |  |  |
|   |                                    | Alive | 138  | 0,942   | 0,235   | 0,020  |       |  |  |  |
|   | Pre-ECMO Neuromuscular blockade    | Dead  | 164  | 0,982   | 0,134   | 0,010  |       |  |  |  |
|   |                                    | Alive | 138  | 0,942   | 0,235   | 0,020  |       |  |  |  |
|   | Pre-ECMO High-dose corticosteroids | Dead  | 164  | 0,189   | 0,393   | 0,031  |       |  |  |  |
|   |                                    | Alive | 138  | 0,217   | 0,414   | 0,035  |       |  |  |  |
| 6 | All ECMO previous year             | Dead  | 164  | 83,290  | 93,699  | 7,317  |       |  |  |  |
|   |                                    | Alive | 138  | 117,600 | 130,413 | 11,102 |       |  |  |  |
|   | VV-ECMO previous year              | Dead  | 164  | 20,744  | 21,583  | 1,685  |       |  |  |  |
|   |                                    | Alive | 138  | 29,877  | 26,426  | 2,250  |       |  |  |  |
|   | Age                                | Dead  | 164  | 52,965  | 8,618   | 0,673  |       |  |  |  |
|   |                                    | Alive | 138  | 48,569  | 10,582  | 0,901  |       |  |  |  |
|   | BMI                                | Dead  | 164  | 30,563  | 5,584   | 0,436  |       |  |  |  |
|   |                                    | Alive | 138  | 30,678  | 6,178   | 0,526  |       |  |  |  |
|   | Hypertension                       | Dead  | 164  | 0,360   | 0,481   | 0,038  |       |  |  |  |
|   |                                    | Alive | 138  | 0,319   | 0,468   | 0,040  |       |  |  |  |
|   | Diabetes                           | Dead  | 164  | 0,317   | 0,467   | 0,036  |       |  |  |  |
|   |                                    | Alive | 138  | 0,254   | 0,437   | 0,037  |       |  |  |  |
|   | Immunocompromised                  | Dead  | 164  | 0,079   | 0,271   | 0,021  |       |  |  |  |
|   |                                    | Alive | 138  | 0,036   | 0,188   | 0,016  |       |  |  |  |
|   | Symptoms - ECMO delay              | Dead  | 164  | 15,584  | 6,788   | 0,530  |       |  |  |  |
|   |                                    | Alive | 138  | 13,615  | 5,285   | 0,450  |       |  |  |  |
|   |                                    |       | Dead | 164     | 5,866   | 4,078  | 0,318 |  |  |  |

|     |                                               |       |        |         |         |        |  |  |  |
|-----|-----------------------------------------------|-------|--------|---------|---------|--------|--|--|--|
|     | Orotracheal intubation - ECMO delay           | Alive | 138    | 4,268   | 3,241   | 0,276  |  |  |  |
|     | Mobile ECMO Transfer                          | Dead  | 164    | 0,348   | 0,478   | 0,037  |  |  |  |
|     |                                               | Alive | 138    | 0,406   | 0,493   | 0,042  |  |  |  |
|     | Pre-ECMO Cardiovascular component of the SOFA | Dead  | 164    | 2,239   | 1,708   | 0,133  |  |  |  |
|     |                                               | Alive | 138    | 2,075   | 1,974   | 0,168  |  |  |  |
|     | Pre-ECMO Liver component of the SOFA          | Dead  | 164    | 0,542   | 0,942   | 0,074  |  |  |  |
|     |                                               | Alive | 138    | 0,374   | 0,698   | 0,059  |  |  |  |
|     | Pre-ECMO Renal component of the SOFA          | Dead  | 164    | 1,404   | 1,575   | 0,123  |  |  |  |
|     |                                               | Alive | 138    | 0,677   | 1,358   | 0,116  |  |  |  |
|     | Pre-ECMO Plateau pressure                     | Dead  | 164    | 30,750  | 6,137   | 0,479  |  |  |  |
|     |                                               | Alive | 138    | 30,285  | 5,282   | 0,450  |  |  |  |
|     | Pre-ECMO paCO2                                | Dead  | 164    | 59,470  | 16,524  | 1,290  |  |  |  |
|     |                                               | Alive | 138    | 56,686  | 15,036  | 1,280  |  |  |  |
|     | Pre-ECMO paO2/FiO2                            | Dead  | 164    | 65,052  | 18,159  | 1,418  |  |  |  |
|     |                                               | Alive | 138    | 63,074  | 17,122  | 1,458  |  |  |  |
|     | Pre-ECMO Prone positioning                    | Dead  | 164    | 0,945   | 0,228   | 0,018  |  |  |  |
|     |                                               | Alive | 138    | 0,942   | 0,235   | 0,020  |  |  |  |
|     | Pre-ECMO Neuromuscular blockade               | Dead  | 164    | 0,982   | 0,134   | 0,010  |  |  |  |
|     |                                               | Alive | 138    | 0,942   | 0,235   | 0,020  |  |  |  |
|     | Pre-ECMO High-dose corticosteroids            | Dead  | 164    | 0,189   | 0,393   | 0,031  |  |  |  |
|     |                                               | Alive | 138    | 0,217   | 0,414   | 0,035  |  |  |  |
| 7   | All ECMO previous year                        | Dead  | 164    | 83,290  | 93,699  | 7,317  |  |  |  |
|     |                                               | Alive | 138    | 117,600 | 130,413 | 11,102 |  |  |  |
|     | VV-ECMO previous year                         | Dead  | 164    | 20,744  | 21,583  | 1,685  |  |  |  |
|     |                                               | Alive | 138    | 29,877  | 26,426  | 2,250  |  |  |  |
|     | Age                                           | Dead  | 164    | 52,965  | 8,618   | 0,673  |  |  |  |
|     |                                               | Alive | 138    | 48,569  | 10,582  | 0,901  |  |  |  |
| BMI | Dead                                          | 164   | 30,507 | 5,575   | 0,435   |        |  |  |  |

|                                               |       |     |        |        |       |  |  |  |
|-----------------------------------------------|-------|-----|--------|--------|-------|--|--|--|
|                                               | Alive | 138 | 30,678 | 6,201  | 0,528 |  |  |  |
| Hypertension                                  | Dead  | 164 | 0,360  | 0,481  | 0,038 |  |  |  |
|                                               | Alive | 138 | 0,319  | 0,468  | 0,040 |  |  |  |
| Diabetes                                      | Dead  | 164 | 0,317  | 0,467  | 0,036 |  |  |  |
|                                               | Alive | 138 | 0,254  | 0,437  | 0,037 |  |  |  |
| Immunocompromised                             | Dead  | 164 | 0,079  | 0,271  | 0,021 |  |  |  |
|                                               | Alive | 138 | 0,036  | 0,188  | 0,016 |  |  |  |
| Symptoms - ECMO delay                         | Dead  | 164 | 15,583 | 6,816  | 0,532 |  |  |  |
|                                               | Alive | 138 | 13,648 | 5,296  | 0,451 |  |  |  |
| Orotracheal intubation - ECMO delay           | Dead  | 164 | 5,866  | 4,078  | 0,318 |  |  |  |
|                                               | Alive | 138 | 4,268  | 3,241  | 0,276 |  |  |  |
| Mobile ECMO Transfer                          | Dead  | 164 | 0,348  | 0,478  | 0,037 |  |  |  |
|                                               | Alive | 138 | 0,413  | 0,494  | 0,042 |  |  |  |
| Pre-ECMO Cardiovascular component of the SOFA | Dead  | 164 | 2,196  | 1,767  | 0,138 |  |  |  |
|                                               | Alive | 138 | 2,160  | 1,846  | 0,157 |  |  |  |
| Pre-ECMO Liver component of the SOFA          | Dead  | 164 | 0,543  | 0,956  | 0,075 |  |  |  |
|                                               | Alive | 138 | 0,390  | 0,696  | 0,059 |  |  |  |
| Pre-ECMO Renal component of the SOFA          | Dead  | 164 | 1,410  | 1,581  | 0,123 |  |  |  |
|                                               | Alive | 138 | 0,667  | 1,321  | 0,112 |  |  |  |
| Pre-ECMO Plateau pressure                     | Dead  | 164 | 30,683 | 6,226  | 0,486 |  |  |  |
|                                               | Alive | 138 | 30,543 | 5,303  | 0,451 |  |  |  |
| Pre-ECMO paCO2                                | Dead  | 164 | 59,409 | 16,672 | 1,302 |  |  |  |
|                                               | Alive | 138 | 56,408 | 14,772 | 1,257 |  |  |  |
| Pre-ECMO paO2/FiO2                            | Dead  | 164 | 64,278 | 17,786 | 1,389 |  |  |  |
|                                               | Alive | 138 | 63,344 | 16,929 | 1,441 |  |  |  |
| Pre-ECMO Prone positioning                    | Dead  | 164 | 0,945  | 0,228  | 0,018 |  |  |  |
|                                               | Alive | 138 | 0,942  | 0,235  | 0,020 |  |  |  |
| Pre-ECMO Neuromuscular blockade               | Dead  | 164 | 0,982  | 0,134  | 0,010 |  |  |  |
|                                               | Alive | 138 | 0,942  | 0,235  | 0,020 |  |  |  |

|                                               |                                    |       |     |         |         |        |  |  |  |
|-----------------------------------------------|------------------------------------|-------|-----|---------|---------|--------|--|--|--|
|                                               | Pre-ECMO High-dose corticosteroids | Dead  | 164 | 0,189   | 0,393   | 0,031  |  |  |  |
|                                               |                                    | Alive | 138 | 0,217   | 0,414   | 0,035  |  |  |  |
| 8                                             | All ECMO previous year             | Dead  | 164 | 83,290  | 93,699  | 7,317  |  |  |  |
|                                               |                                    | Alive | 138 | 117,600 | 130,413 | 11,102 |  |  |  |
|                                               | VV-ECMO previous year              | Dead  | 164 | 20,744  | 21,583  | 1,685  |  |  |  |
|                                               |                                    | Alive | 138 | 29,877  | 26,426  | 2,250  |  |  |  |
| Age                                           |                                    | Dead  | 164 | 52,965  | 8,618   | 0,673  |  |  |  |
|                                               |                                    | Alive | 138 | 48,569  | 10,582  | 0,901  |  |  |  |
| BMI                                           |                                    | Dead  | 164 | 30,603  | 5,586   | 0,436  |  |  |  |
|                                               |                                    | Alive | 138 | 30,674  | 6,247   | 0,532  |  |  |  |
| Hypertension                                  |                                    | Dead  | 164 | 0,360   | 0,481   | 0,038  |  |  |  |
|                                               |                                    | Alive | 138 | 0,319   | 0,468   | 0,040  |  |  |  |
| Diabetes                                      |                                    | Dead  | 164 | 0,317   | 0,467   | 0,036  |  |  |  |
|                                               |                                    | Alive | 138 | 0,254   | 0,437   | 0,037  |  |  |  |
| Immunocompromised                             |                                    | Dead  | 164 | 0,079   | 0,271   | 0,021  |  |  |  |
|                                               |                                    | Alive | 138 | 0,036   | 0,188   | 0,016  |  |  |  |
| Symptoms - ECMO delay                         |                                    | Dead  | 164 | 15,692  | 6,892   | 0,538  |  |  |  |
|                                               |                                    | Alive | 138 | 13,697  | 5,287   | 0,450  |  |  |  |
| Orotracheal intubation - ECMO delay           |                                    | Dead  | 164 | 5,866   | 4,078   | 0,318  |  |  |  |
|                                               |                                    | Alive | 138 | 4,268   | 3,241   | 0,276  |  |  |  |
| Mobile ECMO Transfer                          |                                    | Dead  | 164 | 0,348   | 0,478   | 0,037  |  |  |  |
|                                               |                                    | Alive | 138 | 0,413   | 0,494   | 0,042  |  |  |  |
| Pre-ECMO Cardiovascular component of the SOFA |                                    | Dead  | 164 | 2,259   | 1,737   | 0,136  |  |  |  |
|                                               |                                    | Alive | 138 | 2,122   | 1,791   | 0,152  |  |  |  |
| Pre-ECMO Liver component of the SOFA          |                                    | Dead  | 164 | 0,511   | 0,951   | 0,074  |  |  |  |
|                                               |                                    | Alive | 138 | 0,343   | 0,698   | 0,059  |  |  |  |
| Pre-ECMO Renal component of the SOFA          |                                    | Dead  | 164 | 1,319   | 1,575   | 0,123  |  |  |  |
|                                               |                                    | Alive | 138 | 0,676   | 1,310   | 0,112  |  |  |  |
|                                               |                                    | Dead  | 164 | 30,377  | 6,329   | 0,494  |  |  |  |

|   |                                    |       |      |         |         |        |       |  |  |  |
|---|------------------------------------|-------|------|---------|---------|--------|-------|--|--|--|
|   | Pre-ECMO Plateau pressure          | Alive | 138  | 29,754  | 4,908   | 0,418  |       |  |  |  |
|   | Pre-ECMO paCO2                     | Dead  | 164  | 59,477  | 16,493  | 1,288  |       |  |  |  |
|   |                                    | Alive | 138  | 56,742  | 14,777  | 1,258  |       |  |  |  |
|   | Pre-ECMO paO2/FiO2                 | Dead  | 164  | 64,473  | 17,843  | 1,393  |       |  |  |  |
|   |                                    | Alive | 138  | 63,587  | 16,881  | 1,437  |       |  |  |  |
|   | Pre-ECMO Prone positioning         | Dead  | 164  | 0,945   | 0,228   | 0,018  |       |  |  |  |
|   |                                    | Alive | 138  | 0,942   | 0,235   | 0,020  |       |  |  |  |
|   | Pre-ECMO Neuromuscular blockade    | Dead  | 164  | 0,982   | 0,134   | 0,010  |       |  |  |  |
|   |                                    | Alive | 138  | 0,942   | 0,235   | 0,020  |       |  |  |  |
|   | Pre-ECMO High-dose corticosteroids | Dead  | 164  | 0,189   | 0,393   | 0,031  |       |  |  |  |
|   |                                    | Alive | 138  | 0,217   | 0,414   | 0,035  |       |  |  |  |
| 9 | All ECMO previous year             | Dead  | 164  | 83,290  | 93,699  | 7,317  |       |  |  |  |
|   |                                    | Alive | 138  | 117,600 | 130,413 | 11,102 |       |  |  |  |
|   | VV-ECMO previous year              | Dead  | 164  | 20,744  | 21,583  | 1,685  |       |  |  |  |
|   |                                    | Alive | 138  | 29,877  | 26,426  | 2,250  |       |  |  |  |
|   | Age                                | Dead  | 164  | 52,965  | 8,618   | 0,673  |       |  |  |  |
|   |                                    | Alive | 138  | 48,569  | 10,582  | 0,901  |       |  |  |  |
|   | BMI                                | Dead  | 164  | 30,713  | 5,609   | 0,438  |       |  |  |  |
|   |                                    | Alive | 138  | 30,698  | 6,184   | 0,526  |       |  |  |  |
|   | Hypertension                       | Dead  | 164  | 0,360   | 0,481   | 0,038  |       |  |  |  |
|   |                                    | Alive | 138  | 0,319   | 0,468   | 0,040  |       |  |  |  |
|   | Diabetes                           | Dead  | 164  | 0,317   | 0,467   | 0,036  |       |  |  |  |
|   |                                    | Alive | 138  | 0,254   | 0,437   | 0,037  |       |  |  |  |
|   | Immunocompromised                  | Dead  | 164  | 0,079   | 0,271   | 0,021  |       |  |  |  |
|   |                                    | Alive | 138  | 0,036   | 0,188   | 0,016  |       |  |  |  |
|   | Symptoms - ECMO delay              | Dead  | 164  | 15,557  | 6,864   | 0,536  |       |  |  |  |
|   |                                    | Alive | 138  | 13,700  | 5,410   | 0,461  |       |  |  |  |
|   |                                    |       | Dead | 164     | 5,866   | 4,078  | 0,318 |  |  |  |

|     |                                               |       |        |         |         |        |  |  |  |
|-----|-----------------------------------------------|-------|--------|---------|---------|--------|--|--|--|
|     | Orotracheal intubation - ECMO delay           | Alive | 138    | 4,268   | 3,241   | 0,276  |  |  |  |
|     | Mobile ECMO Transfer                          | Dead  | 164    | 0,348   | 0,478   | 0,037  |  |  |  |
|     |                                               | Alive | 138    | 0,406   | 0,493   | 0,042  |  |  |  |
|     | Pre-ECMO Cardiovascular component of the SOFA | Dead  | 164    | 2,224   | 1,722   | 0,134  |  |  |  |
|     |                                               | Alive | 138    | 2,111   | 1,832   | 0,156  |  |  |  |
|     | Pre-ECMO Liver component of the SOFA          | Dead  | 164    | 0,536   | 0,938   | 0,073  |  |  |  |
|     |                                               | Alive | 138    | 0,392   | 0,690   | 0,059  |  |  |  |
|     | Pre-ECMO Renal component of the SOFA          | Dead  | 164    | 1,378   | 1,565   | 0,122  |  |  |  |
|     |                                               | Alive | 138    | 0,653   | 1,289   | 0,110  |  |  |  |
|     | Pre-ECMO Plateau pressure                     | Dead  | 164    | 30,909  | 6,348   | 0,496  |  |  |  |
|     |                                               | Alive | 138    | 30,378  | 5,575   | 0,475  |  |  |  |
|     | Pre-ECMO paCO2                                | Dead  | 164    | 59,990  | 16,349  | 1,277  |  |  |  |
|     |                                               | Alive | 138    | 56,690  | 14,905  | 1,269  |  |  |  |
|     | Pre-ECMO paO2/FiO2                            | Dead  | 164    | 64,489  | 18,183  | 1,420  |  |  |  |
|     |                                               | Alive | 138    | 63,362  | 16,937  | 1,442  |  |  |  |
|     | Pre-ECMO Prone positioning                    | Dead  | 164    | 0,945   | 0,228   | 0,018  |  |  |  |
|     |                                               | Alive | 138    | 0,942   | 0,235   | 0,020  |  |  |  |
|     | Pre-ECMO Neuromuscular blockade               | Dead  | 164    | 0,982   | 0,134   | 0,010  |  |  |  |
|     |                                               | Alive | 138    | 0,942   | 0,235   | 0,020  |  |  |  |
|     | Pre-ECMO High-dose corticosteroids            | Dead  | 164    | 0,189   | 0,393   | 0,031  |  |  |  |
|     |                                               | Alive | 138    | 0,217   | 0,414   | 0,035  |  |  |  |
| 10  | All ECMO previous year                        | Dead  | 164    | 83,290  | 93,699  | 7,317  |  |  |  |
|     |                                               | Alive | 138    | 117,600 | 130,413 | 11,102 |  |  |  |
|     | VV-ECMO previous year                         | Dead  | 164    | 20,744  | 21,583  | 1,685  |  |  |  |
|     |                                               | Alive | 138    | 29,877  | 26,426  | 2,250  |  |  |  |
|     | Age                                           | Dead  | 164    | 52,965  | 8,618   | 0,673  |  |  |  |
|     |                                               | Alive | 138    | 48,569  | 10,582  | 0,901  |  |  |  |
| BMI | Dead                                          | 164   | 30,576 | 5,560   | 0,434   |        |  |  |  |

|                                               |       |     |        |        |       |  |  |  |
|-----------------------------------------------|-------|-----|--------|--------|-------|--|--|--|
|                                               | Alive | 138 | 30,729 | 6,182  | 0,526 |  |  |  |
| Hypertension                                  | Dead  | 164 | 0,360  | 0,481  | 0,038 |  |  |  |
|                                               | Alive | 138 | 0,319  | 0,468  | 0,040 |  |  |  |
| Diabetes                                      | Dead  | 164 | 0,317  | 0,467  | 0,036 |  |  |  |
|                                               | Alive | 138 | 0,254  | 0,437  | 0,037 |  |  |  |
| Immunocompromised                             | Dead  | 164 | 0,079  | 0,271  | 0,021 |  |  |  |
|                                               | Alive | 138 | 0,036  | 0,188  | 0,016 |  |  |  |
| Symptoms - ECMO delay                         | Dead  | 164 | 15,575 | 6,812  | 0,532 |  |  |  |
|                                               | Alive | 138 | 13,664 | 5,345  | 0,455 |  |  |  |
| Orotracheal intubation - ECMO delay           | Dead  | 164 | 5,866  | 4,078  | 0,318 |  |  |  |
|                                               | Alive | 138 | 4,268  | 3,241  | 0,276 |  |  |  |
| Mobile ECMO Transfer                          | Dead  | 164 | 0,348  | 0,478  | 0,037 |  |  |  |
|                                               | Alive | 138 | 0,406  | 0,493  | 0,042 |  |  |  |
| Pre-ECMO Cardiovascular component of the SOFA | Dead  | 164 | 2,259  | 1,688  | 0,132 |  |  |  |
|                                               | Alive | 138 | 2,106  | 1,813  | 0,154 |  |  |  |
| Pre-ECMO Liver component of the SOFA          | Dead  | 164 | 0,523  | 0,939  | 0,073 |  |  |  |
|                                               | Alive | 138 | 0,373  | 0,684  | 0,058 |  |  |  |
| Pre-ECMO Renal component of the SOFA          | Dead  | 164 | 1,361  | 1,583  | 0,124 |  |  |  |
|                                               | Alive | 138 | 0,716  | 1,290  | 0,110 |  |  |  |
| Pre-ECMO Plateau pressure                     | Dead  | 164 | 30,425 | 6,285  | 0,491 |  |  |  |
|                                               | Alive | 138 | 30,272 | 5,154  | 0,439 |  |  |  |
| Pre-ECMO paCO2                                | Dead  | 164 | 59,734 | 16,399 | 1,281 |  |  |  |
|                                               | Alive | 138 | 56,978 | 14,894 | 1,268 |  |  |  |
| Pre-ECMO paO2/FiO2                            | Dead  | 164 | 64,412 | 17,821 | 1,392 |  |  |  |
|                                               | Alive | 138 | 63,410 | 16,789 | 1,429 |  |  |  |
| Pre-ECMO Prone positioning                    | Dead  | 164 | 0,945  | 0,228  | 0,018 |  |  |  |
|                                               | Alive | 138 | 0,942  | 0,235  | 0,020 |  |  |  |
| Pre-ECMO Neuromuscular blockade               | Dead  | 164 | 0,982  | 0,134  | 0,010 |  |  |  |
|                                               | Alive | 138 | 0,942  | 0,235  | 0,020 |  |  |  |



|                                               |                                     |       |       |         |         |        |       |       |       |
|-----------------------------------------------|-------------------------------------|-------|-------|---------|---------|--------|-------|-------|-------|
|                                               | Pre-ECMO High-dose corticosteroids  | Dead  | 164   | 0,189   | 0,393   | 0,031  |       |       |       |
|                                               |                                     | Alive | 138   | 0,217   | 0,414   | 0,035  |       |       |       |
| Pooled                                        | All ECMO previous year              | Dead  | 164   | 83,290  | 93,699  | 7,317  | 0,000 | 0,000 | 1,000 |
|                                               |                                     | Alive | 138   | 117,600 | 130,413 | 11,102 | 0,000 | 0,000 | 1,000 |
|                                               | VV-ECMO previous year               | Dead  | 164   | 20,744  |         | 1,685  | 0,000 | 0,000 | 1,000 |
|                                               |                                     | Alive | 138   | 29,877  |         | 2,250  | 0,000 | 0,000 | 1,000 |
|                                               | Age                                 | Dead  | 164   | 52,965  |         | 0,673  | 0,000 | 0,000 | 1,000 |
|                                               |                                     | Alive | 138   | 48,569  |         | 0,901  | 0,000 | 0,000 | 1,000 |
|                                               | BMI                                 | Dead  | 164   | 30,554  |         | 0,444  | 0,029 | 0,030 | 0,997 |
|                                               |                                     | Alive | 138   | 30,698  |         | 0,529  | 0,006 | 0,006 | 0,999 |
|                                               | Hypertension                        | Dead  | 164   | 0,360   |         | 0,038  | 0,000 | 0,000 | 1,000 |
|                                               |                                     | Alive | 138   | 0,319   |         | 0,040  | 0,000 | 0,000 | 1,000 |
|                                               | Diabetes                            | Dead  | 164   | 0,317   |         | 0,036  | 0,000 | 0,000 | 1,000 |
|                                               |                                     | Alive | 138   | 0,254   |         | 0,037  | 0,000 | 0,000 | 1,000 |
|                                               | Immunocompromised                   | Dead  | 164   | 0,079   |         | 0,021  | 0,000 | 0,000 | 1,000 |
|                                               |                                     | Alive | 138   | 0,036   |         | 0,016  | 0,000 | 0,000 | 1,000 |
|                                               | Symptoms - ECMO delay               | Dead  | 164   | 15,624  |         | 0,539  | 0,011 | 0,011 | 0,999 |
|                                               |                                     | Alive | 138   | 13,654  |         | 0,454  | 0,005 | 0,005 | 1,000 |
|                                               | Orotracheal intubation - ECMO delay | Dead  | 164   | 5,866   |         | 0,318  | 0,000 | 0,000 | 1,000 |
|                                               |                                     | Alive | 138   | 4,268   |         | 0,276  | 0,000 | 0,000 | 1,000 |
|                                               | Mobile ECMO Transfer                | Dead  | 164   | 0,348   |         | 0,037  | 0,000 | 0,000 | 1,000 |
|                                               |                                     | Alive | 138   | 0,408   |         | 0,042  | 0,008 | 0,008 | 0,999 |
| Pre-ECMO Cardiovascular component of the SOFA | Dead                                | 164   | 2,234 |         | 0,137   | 0,032  | 0,033 | 0,997 |       |
|                                               | Alive                               | 138   | 2,121 |         | 0,162   | 0,061  | 0,064 | 0,994 |       |
| Pre-ECMO Liver component of the SOFA          | Dead                                | 164   | 0,531 |         | 0,077   | 0,057  | 0,060 | 0,994 |       |
|                                               | Alive                               | 138   | 0,370 |         | 0,063   | 0,112  | 0,124 | 0,989 |       |
| Pre-ECMO Renal component of the SOFA          | Dead                                | 164   | 1,364 |         | 0,128   | 0,075  | 0,079 | 0,993 |       |
|                                               | Alive                               | 138   | 0,686 |         | 0,114   | 0,042  | 0,043 | 0,996 |       |
|                                               |                                     | Dead  | 164   | 30,650  |         | 0,523  | 0,134 | 0,150 | 0,987 |

|  |                                    |       |     |        |  |       |       |       |       |
|--|------------------------------------|-------|-----|--------|--|-------|-------|-------|-------|
|  | Pre-ECMO Plateau pressure          | Alive | 138 | 30,214 |  | 0,493 | 0,216 | 0,263 | 0,979 |
|  | Pre-ECMO paCO2                     | Dead  | 164 | 59,633 |  | 1,338 | 0,078 | 0,083 | 0,992 |
|  |                                    | Alive | 138 | 56,738 |  | 1,283 | 0,027 | 0,028 | 0,997 |
|  | Pre-ECMO paO2/FiO2                 | Dead  | 164 | 64,442 |  | 1,448 | 0,072 | 0,076 | 0,993 |
|  |                                    | Alive | 138 | 63,383 |  | 1,459 | 0,022 | 0,023 | 0,998 |
|  | Pre-ECMO Prone positioning         | Dead  | 164 | 0,945  |  | 0,018 | 0,000 | 0,000 | 1,000 |
|  |                                    | Alive | 138 | 0,942  |  | 0,020 | 0,000 | 0,000 | 1,000 |
|  | Pre-ECMO Neuromuscular blockade    | Dead  | 164 | 0,982  |  | 0,010 | 0,000 | 0,000 | 1,000 |
|  |                                    | Alive | 138 | 0,942  |  | 0,020 | 0,000 | 0,000 | 1,000 |
|  | Pre-ECMO High-dose corticosteroids | Dead  | 164 | 0,189  |  | 0,031 | 0,000 | 0,000 | 1,000 |
|  |                                    | Alive | 138 | 0,217  |  | 0,035 | 0,000 | 0,000 | 1,000 |

**Table S2: Independent samples test of the Multiple Imputation data**

| Imputation Number | Variables                                     | Statistical test for Equality of Means |     |                 |                 |                       |                          |       | Fraction Missing Info. | Relative Increase Variance | Relative Efficiency |
|-------------------|-----------------------------------------------|----------------------------------------|-----|-----------------|-----------------|-----------------------|--------------------------|-------|------------------------|----------------------------|---------------------|
|                   |                                               | t                                      | df  | Sig. (2-tailed) | Mean Difference | Std. Error Difference | 95% CI of the Difference |       |                        |                            |                     |
|                   |                                               |                                        |     |                 |                 |                       | Lower                    | Upper |                        |                            |                     |
| Original data     | All ECMO previous year                        | -2,65                                  | 300 | 0,01            | -34,31          | 12,93                 | -59,76                   | -8,86 |                        |                            |                     |
|                   | VV-ECMO previous year                         | -3,31                                  | 300 | 0,00            | -9,13           | 2,76                  | -14,57                   | -3,70 |                        |                            |                     |
|                   | Age                                           | 3,98                                   | 300 | 0,00            | 4,40            | 1,10                  | 2,22                     | 6,57  |                        |                            |                     |
|                   | BMI                                           | -0,19                                  | 294 | 0,85            | -0,13           | 0,69                  | -1,48                    | 1,22  |                        |                            |                     |
|                   | Hypertension                                  | 0,75                                   | 300 | 0,46            | 0,04            | 0,05                  | -0,07                    | 0,15  |                        |                            |                     |
|                   | Diabetes                                      | 1,21                                   | 300 | 0,23            | 0,06            | 0,05                  | -0,04                    | 0,17  |                        |                            |                     |
|                   | Immunocompromised                             | 1,57                                   | 300 | 0,12            | 0,04            | 0,03                  | -0,01                    | 0,10  |                        |                            |                     |
|                   | Symptoms - ECMO delay                         | 2,62                                   | 293 | 0,01            | 1,90            | 0,72                  | 0,47                     | 3,33  |                        |                            |                     |
|                   | Orotracheal intubation - ECMO delay           | 3,72                                   | 300 | 0,00            | 1,60            | 0,43                  | 0,75                     | 2,44  |                        |                            |                     |
|                   | Mobile ECMO Transfer                          | -1,09                                  | 299 | 0,28            | -0,06           | 0,06                  | -0,17                    | 0,05  |                        |                            |                     |
|                   | Pre-ECMO Cardiovascular component of the SOFA | 0,64                                   | 282 | 0,52            | 0,14            | 0,21                  | -0,28                    | 0,55  |                        |                            |                     |
|                   | Pre-ECMO Liver component of the SOFA          | 1,84                                   | 282 | 0,07            | 0,18            | 0,10                  | -0,01                    | 0,38  |                        |                            |                     |

|   |                                      |       |     |      |        |       |        |       |  |  |  |
|---|--------------------------------------|-------|-----|------|--------|-------|--------|-------|--|--|--|
|   | Pre-ECMO Renal component of the SOFA | 4,08  | 283 | 0,00 | 0,71   | 0,17  | 0,36   | 1,05  |  |  |  |
|   | Pre-ECMO Plateau pressure            | 0,81  | 250 | 0,42 | 0,58   | 0,72  | -0,84  | 2,00  |  |  |  |
|   | Pre-ECMO paCO2                       | 1,62  | 284 | 0,11 | 3,04   | 1,87  | -0,65  | 6,72  |  |  |  |
|   | Pre-ECMO paO2/FiO2                   | 0,54  | 292 | 0,59 | 1,10   | 2,03  | -2,90  | 5,10  |  |  |  |
|   | Pre-ECMO Prone positioning           | 0,12  | 300 | 0,91 | 0,00   | 0,03  | -0,05  | 0,06  |  |  |  |
|   | Pre-ECMO Neuromuscular blockade      | 1,84  | 300 | 0,07 | 0,04   | 0,02  | 0,00   | 0,08  |  |  |  |
|   | Pre-ECMO High-dose corticosteroids   | -0,61 | 300 | 0,54 | -0,03  | 0,05  | -0,12  | 0,06  |  |  |  |
| 1 | All ECMO previous year               | -2,65 | 300 | 0,01 | -34,31 | 12,93 | -59,76 | -8,86 |  |  |  |
|   | VV-ECMO previous year                | -3,31 | 300 | 0,00 | -9,13  | 2,76  | -14,57 | -3,70 |  |  |  |
|   | Age                                  | 3,98  | 300 | 0,00 | 4,40   | 1,10  | 2,22   | 6,57  |  |  |  |
|   | BMI                                  | -0,37 | 300 | 0,71 | -0,25  | 0,68  | -1,59  | 1,09  |  |  |  |
|   | Hypertension                         | 0,75  | 300 | 0,46 | 0,04   | 0,05  | -0,07  | 0,15  |  |  |  |
|   | Diabetes                             | 1,21  | 300 | 0,23 | 0,06   | 0,05  | -0,04  | 0,17  |  |  |  |
|   | Immunocompromised                    | 1,57  | 300 | 0,12 | 0,04   | 0,03  | -0,01  | 0,10  |  |  |  |
|   | Symptoms - ECMO delay                | 2,85  | 300 | 0,00 | 2,03   | 0,71  | 0,63   | 3,44  |  |  |  |
|   | Orotracheal intubation - ECMO delay  | 3,72  | 300 | 0,00 | 1,60   | 0,43  | 0,75   | 2,44  |  |  |  |
|   | Mobile ECMO Transfer                 | -1,04 | 300 | 0,30 | -0,06  | 0,06  | -0,17  | 0,05  |  |  |  |

|   |                                               |       |     |      |        |       |        |       |  |  |  |
|---|-----------------------------------------------|-------|-----|------|--------|-------|--------|-------|--|--|--|
|   | Pre-ECMO Cardiovascular component of the SOFA | 0,84  | 300 | 0,40 | 0,17   | 0,20  | -0,23  | 0,57  |  |  |  |
|   | Pre-ECMO Liver component of the SOFA          | 1,50  | 300 | 0,13 | 0,15   | 0,10  | -0,05  | 0,34  |  |  |  |
|   | Pre-ECMO Renal component of the SOFA          | 4,17  | 300 | 0,00 | 0,70   | 0,17  | 0,37   | 1,04  |  |  |  |
|   | Pre-ECMO Plateau pressure                     | 1,08  | 300 | 0,28 | 0,72   | 0,67  | -0,59  | 2,03  |  |  |  |
|   | Pre-ECMO paCO2                                | 1,29  | 300 | 0,20 | 2,35   | 1,82  | -1,23  | 5,92  |  |  |  |
|   | Pre-ECMO paO2/FiO2                            | 0,12  | 300 | 0,91 | 0,24   | 2,02  | -3,73  | 4,20  |  |  |  |
|   | Pre-ECMO Prone positioning                    | 0,12  | 300 | 0,91 | 0,00   | 0,03  | -0,05  | 0,06  |  |  |  |
|   | Pre-ECMO Neuromuscular blockade               | 1,84  | 300 | 0,07 | 0,04   | 0,02  | 0,00   | 0,08  |  |  |  |
|   | Pre-ECMO High-dose corticosteroids            | -0,61 | 300 | 0,54 | -0,03  | 0,05  | -0,12  | 0,06  |  |  |  |
| 2 | All ECMO previous year                        | -2,65 | 300 | 0,01 | -34,31 | 12,93 | -59,76 | -8,86 |  |  |  |
|   | VV-ECMO previous year                         | -3,31 | 300 | 0,00 | -9,13  | 2,76  | -14,57 | -3,70 |  |  |  |
|   | Age                                           | 3,98  | 300 | 0,00 | 4,40   | 1,10  | 2,22   | 6,57  |  |  |  |
|   | BMI                                           | -0,23 | 300 | 0,82 | -0,16  | 0,68  | -1,50  | 1,19  |  |  |  |
|   | Hypertension                                  | 0,75  | 300 | 0,46 | 0,04   | 0,05  | -0,07  | 0,15  |  |  |  |
|   | Diabetes                                      | 1,21  | 300 | 0,23 | 0,06   | 0,05  | -0,04  | 0,17  |  |  |  |
|   | Immunocompromised                             | 1,57  | 300 | 0,12 | 0,04   | 0,03  | -0,01  | 0,10  |  |  |  |
|   | Symptoms - ECMO delay                         | 2,82  | 300 | 0,01 | 2,03   | 0,72  | 0,61   | 3,45  |  |  |  |

|   |                                               |       |     |      |        |       |        |       |  |  |  |
|---|-----------------------------------------------|-------|-----|------|--------|-------|--------|-------|--|--|--|
|   | Orotracheal intubation - ECMO delay           | 3,72  | 300 | 0,00 | 1,60   | 0,43  | 0,75   | 2,44  |  |  |  |
|   | Mobile ECMO Transfer                          | -1,04 | 300 | 0,30 | -0,06  | 0,06  | -0,17  | 0,05  |  |  |  |
|   | Pre-ECMO Cardiovascular component of the SOFA | 0,64  | 300 | 0,52 | 0,13   | 0,20  | -0,27  | 0,52  |  |  |  |
|   | Pre-ECMO Liver component of the SOFA          | 2,10  | 300 | 0,04 | 0,21   | 0,10  | 0,01   | 0,40  |  |  |  |
|   | Pre-ECMO Renal component of the SOFA          | 4,09  | 300 | 0,00 | 0,69   | 0,17  | 0,36   | 1,02  |  |  |  |
|   | Pre-ECMO Plateau pressure                     | 0,66  | 300 | 0,51 | 0,42   | 0,64  | -0,83  | 1,67  |  |  |  |
|   | Pre-ECMO paCO2                                | 1,20  | 300 | 0,23 | 2,20   | 1,83  | -1,40  | 5,80  |  |  |  |
|   | Pre-ECMO paO2/FiO2                            | 0,72  | 300 | 0,47 | 1,45   | 2,00  | -2,49  | 5,39  |  |  |  |
|   | Pre-ECMO Prone positioning                    | 0,12  | 300 | 0,91 | 0,00   | 0,03  | -0,05  | 0,06  |  |  |  |
|   | Pre-ECMO Neuromuscular blockade               | 1,84  | 300 | 0,07 | 0,04   | 0,02  | 0,00   | 0,08  |  |  |  |
|   | Pre-ECMO High-dose corticosteroids            | -0,61 | 300 | 0,54 | -0,03  | 0,05  | -0,12  | 0,06  |  |  |  |
| 3 | All ECMO previous year                        | -2,65 | 300 | 0,01 | -34,31 | 12,93 | -59,76 | -8,86 |  |  |  |
|   | VV-ECMO previous year                         | -3,31 | 300 | 0,00 | -9,13  | 2,76  | -14,57 | -3,70 |  |  |  |
|   | Age                                           | 3,98  | 300 | 0,00 | 4,40   | 1,10  | 2,22   | 6,57  |  |  |  |
|   | BMI                                           | -0,23 | 300 | 0,82 | -0,16  | 0,68  | -1,50  | 1,18  |  |  |  |
|   | Hypertension                                  | 0,75  | 300 | 0,46 | 0,04   | 0,05  | -0,07  | 0,15  |  |  |  |

|   |                                               |       |     |      |        |       |        |       |  |  |  |
|---|-----------------------------------------------|-------|-----|------|--------|-------|--------|-------|--|--|--|
|   | Diabetes                                      | 1,21  | 300 | 0,23 | 0,06   | 0,05  | -0,04  | 0,17  |  |  |  |
|   | Immunocompromised                             | 1,57  | 300 | 0,12 | 0,04   | 0,03  | -0,01  | 0,10  |  |  |  |
|   | Symptoms - ECMO delay                         | 2,85  | 300 | 0,00 | 2,05   | 0,72  | 0,63   | 3,48  |  |  |  |
|   | Orotracheal intubation - ECMO delay           | 3,72  | 300 | 0,00 | 1,60   | 0,43  | 0,75   | 2,44  |  |  |  |
|   | Mobile ECMO Transfer                          | -1,04 | 300 | 0,30 | -0,06  | 0,06  | -0,17  | 0,05  |  |  |  |
|   | Pre-ECMO Cardiovascular component of the SOFA | 0,41  | 300 | 0,68 | 0,08   | 0,20  | -0,32  | 0,49  |  |  |  |
|   | Pre-ECMO Liver component of the SOFA          | 1,29  | 300 | 0,20 | 0,13   | 0,10  | -0,07  | 0,32  |  |  |  |
|   | Pre-ECMO Renal component of the SOFA          | 3,81  | 300 | 0,00 | 0,64   | 0,17  | 0,31   | 0,97  |  |  |  |
|   | Pre-ECMO Plateau pressure                     | 0,98  | 300 | 0,33 | 0,67   | 0,68  | -0,67  | 2,01  |  |  |  |
|   | Pre-ECMO paCO2                                | 1,94  | 300 | 0,05 | 3,50   | 1,80  | -0,05  | 7,05  |  |  |  |
|   | Pre-ECMO paO2/FiO2                            | 0,40  | 300 | 0,69 | 0,82   | 2,03  | -3,17  | 4,81  |  |  |  |
|   | Pre-ECMO Prone positioning                    | 0,12  | 300 | 0,91 | 0,00   | 0,03  | -0,05  | 0,06  |  |  |  |
|   | Pre-ECMO Neuromuscular blockade               | 1,84  | 300 | 0,07 | 0,04   | 0,02  | 0,00   | 0,08  |  |  |  |
|   | Pre-ECMO High-dose corticosteroids            | -0,61 | 300 | 0,54 | -0,03  | 0,05  | -0,12  | 0,06  |  |  |  |
| 4 | All ECMO previous year                        | -2,65 | 300 | 0,01 | -34,31 | 12,93 | -59,76 | -8,86 |  |  |  |

|                                               |       |     |      |       |      |        |       |  |  |  |
|-----------------------------------------------|-------|-----|------|-------|------|--------|-------|--|--|--|
| VV-ECMO previous year                         | -3,31 | 300 | 0,00 | -9,13 | 2,76 | -14,57 | -3,70 |  |  |  |
| Age                                           | 3,98  | 300 | 0,00 | 4,40  | 1,10 | 2,22   | 6,57  |  |  |  |
| BMI                                           | -0,35 | 300 | 0,73 | -0,24 | 0,68 | -1,57  | 1,09  |  |  |  |
| Hypertension                                  | 0,75  | 300 | 0,46 | 0,04  | 0,05 | -0,07  | 0,15  |  |  |  |
| Diabetes                                      | 1,21  | 300 | 0,23 | 0,06  | 0,05 | -0,04  | 0,17  |  |  |  |
| Immunocompromised                             | 1,57  | 300 | 0,12 | 0,04  | 0,03 | -0,01  | 0,10  |  |  |  |
| Symptoms - ECMO delay                         | 2,71  | 300 | 0,01 | 1,95  | 0,72 | 0,53   | 3,36  |  |  |  |
| Orotracheal intubation - ECMO delay           | 3,72  | 300 | 0,00 | 1,60  | 0,43 | 0,75   | 2,44  |  |  |  |
| Mobile ECMO Transfer                          | -1,17 | 300 | 0,24 | -0,07 | 0,06 | -0,18  | 0,04  |  |  |  |
| Pre-ECMO Cardiovascular component of the SOFA | 0,37  | 300 | 0,71 | 0,08  | 0,21 | -0,33  | 0,49  |  |  |  |
| Pre-ECMO Liver component of the SOFA          | 1,70  | 300 | 0,09 | 0,17  | 0,10 | -0,03  | 0,36  |  |  |  |
| Pre-ECMO Renal component of the SOFA          | 3,67  | 300 | 0,00 | 0,62  | 0,17 | 0,29   | 0,95  |  |  |  |
| Pre-ECMO Plateau pressure                     | 0,51  | 300 | 0,61 | 0,34  | 0,66 | -0,96  | 1,64  |  |  |  |
| Pre-ECMO paCO2                                | 1,74  | 300 | 0,08 | 3,16  | 1,82 | -0,42  | 6,74  |  |  |  |
| Pre-ECMO paO2/FiO2                            | 0,66  | 300 | 0,51 | 1,32  | 2,00 | -2,62  | 5,27  |  |  |  |
| Pre-ECMO Prone positioning                    | 0,12  | 300 | 0,91 | 0,00  | 0,03 | -0,05  | 0,06  |  |  |  |



|   |                                                     |       |     |      |        |       |        |       |  |  |  |
|---|-----------------------------------------------------|-------|-----|------|--------|-------|--------|-------|--|--|--|
|   | Pre-ECMO<br>Neuromuscular blockade                  | 1,84  | 300 | 0,07 | 0,04   | 0,02  | 0,00   | 0,08  |  |  |  |
|   | Pre-ECMO High-dose<br>corticosteroids               | -0,61 | 300 | 0,54 | -0,03  | 0,05  | -0,12  | 0,06  |  |  |  |
| 5 | All ECMO previous year                              | -2,65 | 300 | 0,01 | -34,31 | 12,93 | -59,76 | -8,86 |  |  |  |
|   | VV-ECMO previous<br>year                            | -3,31 | 300 | 0,00 | -9,13  | 2,76  | -14,57 | -3,70 |  |  |  |
|   | Age                                                 | 3,98  | 300 | 0,00 | 4,40   | 1,10  | 2,22   | 6,57  |  |  |  |
|   | BMI                                                 | -0,21 | 300 | 0,84 | -0,14  | 0,68  | -1,48  | 1,19  |  |  |  |
|   | Hypertension                                        | 0,75  | 300 | 0,46 | 0,04   | 0,05  | -0,07  | 0,15  |  |  |  |
|   | Diabetes                                            | 1,21  | 300 | 0,23 | 0,06   | 0,05  | -0,04  | 0,17  |  |  |  |
|   | Immunocompromised                                   | 1,57  | 300 | 0,12 | 0,04   | 0,03  | -0,01  | 0,10  |  |  |  |
|   | Symptoms - ECMO<br>delay                            | 2,75  | 300 | 0,01 | 1,96   | 0,72  | 0,56   | 3,37  |  |  |  |
|   | Orotracheal intubation -<br>ECMO delay              | 3,72  | 300 | 0,00 | 1,60   | 0,43  | 0,75   | 2,44  |  |  |  |
|   | Mobile ECMO Transfer                                | -1,04 | 300 | 0,30 | -0,06  | 0,06  | -0,17  | 0,05  |  |  |  |
|   | Pre-ECMO<br>Cardiovascular<br>component of the SOFA | 0,33  | 300 | 0,74 | 0,07   | 0,21  | -0,34  | 0,48  |  |  |  |
|   | Pre-ECMO Liver<br>component of the SOFA             | 1,85  | 300 | 0,07 | 0,18   | 0,10  | -0,01  | 0,38  |  |  |  |
|   | Pre-ECMO Renal<br>component of the SOFA             | 3,76  | 300 | 0,00 | 0,64   | 0,17  | 0,30   | 0,97  |  |  |  |
|   | Pre-ECMO Plateau<br>pressure                        | 0,47  | 300 | 0,64 | 0,31   | 0,66  | -0,99  | 1,60  |  |  |  |

|   |                                               |       |     |      |        |       |        |       |  |  |  |
|---|-----------------------------------------------|-------|-----|------|--------|-------|--------|-------|--|--|--|
|   | Pre-ECMO paCO2                                | 1,74  | 300 | 0,08 | 3,16   | 1,82  | -0,42  | 6,74  |  |  |  |
|   | Pre-ECMO paO2/FiO2                            | 0,41  | 300 | 0,68 | 0,83   | 2,01  | -3,13  | 4,79  |  |  |  |
|   | Pre-ECMO Prone positioning                    | 0,12  | 300 | 0,91 | 0,00   | 0,03  | -0,05  | 0,06  |  |  |  |
|   | Pre-ECMO Neuromuscular blockade               | 1,84  | 300 | 0,07 | 0,04   | 0,02  | 0,00   | 0,08  |  |  |  |
|   | Pre-ECMO High-dose corticosteroids            | -0,61 | 300 | 0,54 | -0,03  | 0,05  | -0,12  | 0,06  |  |  |  |
| 6 | All ECMO previous year                        | -2,65 | 300 | 0,01 | -34,31 | 12,93 | -59,76 | -8,86 |  |  |  |
|   | VV-ECMO previous year                         | -3,31 | 300 | 0,00 | -9,13  | 2,76  | -14,57 | -3,70 |  |  |  |
|   | Age                                           | 3,98  | 300 | 0,00 | 4,40   | 1,10  | 2,22   | 6,57  |  |  |  |
|   | BMI                                           | -0,17 | 300 | 0,86 | -0,12  | 0,68  | -1,45  | 1,22  |  |  |  |
|   | Hypertension                                  | 0,75  | 300 | 0,46 | 0,04   | 0,05  | -0,07  | 0,15  |  |  |  |
|   | Diabetes                                      | 1,21  | 300 | 0,23 | 0,06   | 0,05  | -0,04  | 0,17  |  |  |  |
|   | Immunocompromised                             | 1,57  | 300 | 0,12 | 0,04   | 0,03  | -0,01  | 0,10  |  |  |  |
|   | Symptoms - ECMO delay                         | 2,77  | 300 | 0,01 | 1,97   | 0,71  | 0,57   | 3,37  |  |  |  |
|   | Orotracheal intubation - ECMO delay           | 3,72  | 300 | 0,00 | 1,60   | 0,43  | 0,75   | 2,44  |  |  |  |
|   | Mobile ECMO Transfer                          | -1,04 | 300 | 0,30 | -0,06  | 0,06  | -0,17  | 0,05  |  |  |  |
|   | Pre-ECMO Cardiovascular component of the SOFA | 0,77  | 300 | 0,44 | 0,16   | 0,21  | -0,25  | 0,58  |  |  |  |
|   | Pre-ECMO Liver component of the SOFA          | 1,74  | 300 | 0,08 | 0,17   | 0,10  | -0,02  | 0,36  |  |  |  |

|   |                                      |       |     |      |        |       |        |       |  |  |  |
|---|--------------------------------------|-------|-----|------|--------|-------|--------|-------|--|--|--|
|   | Pre-ECMO Renal component of the SOFA | 4,25  | 300 | 0,00 | 0,73   | 0,17  | 0,39   | 1,06  |  |  |  |
|   | Pre-ECMO Plateau pressure            | 0,70  | 300 | 0,49 | 0,46   | 0,67  | -0,85  | 1,77  |  |  |  |
|   | Pre-ECMO paCO2                       | 1,52  | 300 | 0,13 | 2,78   | 1,83  | -0,82  | 6,39  |  |  |  |
|   | Pre-ECMO paO2/FiO2                   | 0,97  | 300 | 0,33 | 1,98   | 2,04  | -2,04  | 6,00  |  |  |  |
|   | Pre-ECMO Prone positioning           | 0,12  | 300 | 0,91 | 0,00   | 0,03  | -0,05  | 0,06  |  |  |  |
|   | Pre-ECMO Neuromuscular blockade      | 1,84  | 300 | 0,07 | 0,04   | 0,02  | 0,00   | 0,08  |  |  |  |
|   | Pre-ECMO High-dose corticosteroids   | -0,61 | 300 | 0,54 | -0,03  | 0,05  | -0,12  | 0,06  |  |  |  |
| 7 | All ECMO previous year               | -2,65 | 300 | 0,01 | -34,31 | 12,93 | -59,76 | -8,86 |  |  |  |
|   | VV-ECMO previous year                | -3,31 | 300 | 0,00 | -9,13  | 2,76  | -14,57 | -3,70 |  |  |  |
|   | Age                                  | 3,98  | 300 | 0,00 | 4,40   | 1,10  | 2,22   | 6,57  |  |  |  |
|   | BMI                                  | -0,25 | 300 | 0,80 | -0,17  | 0,68  | -1,51  | 1,16  |  |  |  |
|   | Hypertension                         | 0,75  | 300 | 0,46 | 0,04   | 0,05  | -0,07  | 0,15  |  |  |  |
|   | Diabetes                             | 1,21  | 300 | 0,23 | 0,06   | 0,05  | -0,04  | 0,17  |  |  |  |
|   | Immunocompromised                    | 1,57  | 300 | 0,12 | 0,04   | 0,03  | -0,01  | 0,10  |  |  |  |
|   | Symptoms - ECMO delay                | 2,72  | 300 | 0,01 | 1,94   | 0,71  | 0,53   | 3,34  |  |  |  |
|   | Orotracheal intubation - ECMO delay  | 3,72  | 300 | 0,00 | 1,60   | 0,43  | 0,75   | 2,44  |  |  |  |
|   | Mobile ECMO Transfer                 | -1,17 | 300 | 0,24 | -0,07  | 0,06  | -0,18  | 0,04  |  |  |  |

|   |                                               |       |     |      |        |       |        |       |  |  |  |
|---|-----------------------------------------------|-------|-----|------|--------|-------|--------|-------|--|--|--|
|   | Pre-ECMO Cardiovascular component of the SOFA | 0,17  | 300 | 0,86 | 0,04   | 0,21  | -0,37  | 0,45  |  |  |  |
|   | Pre-ECMO Liver component of the SOFA          | 1,56  | 300 | 0,12 | 0,15   | 0,10  | -0,04  | 0,35  |  |  |  |
|   | Pre-ECMO Renal component of the SOFA          | 4,38  | 300 | 0,00 | 0,74   | 0,17  | 0,41   | 1,08  |  |  |  |
|   | Pre-ECMO Plateau pressure                     | 0,21  | 300 | 0,84 | 0,14   | 0,67  | -1,18  | 1,46  |  |  |  |
|   | Pre-ECMO paCO2                                | 1,64  | 300 | 0,10 | 3,00   | 1,83  | -0,60  | 6,60  |  |  |  |
|   | Pre-ECMO paO2/FiO2                            | 0,46  | 300 | 0,64 | 0,93   | 2,01  | -3,02  | 4,89  |  |  |  |
|   | Pre-ECMO Prone positioning                    | 0,12  | 300 | 0,91 | 0,00   | 0,03  | -0,05  | 0,06  |  |  |  |
|   | Pre-ECMO Neuromuscular blockade               | 1,84  | 300 | 0,07 | 0,04   | 0,02  | 0,00   | 0,08  |  |  |  |
|   | Pre-ECMO High-dose corticosteroids            | -0,61 | 300 | 0,54 | -0,03  | 0,05  | -0,12  | 0,06  |  |  |  |
| 8 | All ECMO previous year                        | -2,65 | 300 | 0,01 | -34,31 | 12,93 | -59,76 | -8,86 |  |  |  |
|   | VV-ECMO previous year                         | -3,31 | 300 | 0,00 | -9,13  | 2,76  | -14,57 | -3,70 |  |  |  |
|   | Age                                           | 3,98  | 300 | 0,00 | 4,40   | 1,10  | 2,22   | 6,57  |  |  |  |
|   | BMI                                           | -0,10 | 300 | 0,92 | -0,07  | 0,68  | -1,41  | 1,27  |  |  |  |
|   | Hypertension                                  | 0,75  | 300 | 0,46 | 0,04   | 0,05  | -0,07  | 0,15  |  |  |  |
|   | Diabetes                                      | 1,21  | 300 | 0,23 | 0,06   | 0,05  | -0,04  | 0,17  |  |  |  |
|   | Immunocompromised                             | 1,57  | 300 | 0,12 | 0,04   | 0,03  | -0,01  | 0,10  |  |  |  |
|   | Symptoms - ECMO delay                         | 2,78  | 300 | 0,01 | 1,99   | 0,72  | 0,58   | 3,41  |  |  |  |

|   |                                               |       |     |      |        |       |        |       |  |  |  |
|---|-----------------------------------------------|-------|-----|------|--------|-------|--------|-------|--|--|--|
|   | Orotracheal intubation - ECMO delay           | 3,72  | 300 | 0,00 | 1,60   | 0,43  | 0,75   | 2,44  |  |  |  |
|   | Mobile ECMO Transfer                          | -1,17 | 300 | 0,24 | -0,07  | 0,06  | -0,18  | 0,04  |  |  |  |
|   | Pre-ECMO Cardiovascular component of the SOFA | 0,67  | 300 | 0,50 | 0,14   | 0,20  | -0,26  | 0,54  |  |  |  |
|   | Pre-ECMO Liver component of the SOFA          | 1,72  | 300 | 0,09 | 0,17   | 0,10  | -0,02  | 0,36  |  |  |  |
|   | Pre-ECMO Renal component of the SOFA          | 3,81  | 300 | 0,00 | 0,64   | 0,17  | 0,31   | 0,98  |  |  |  |
|   | Pre-ECMO Plateau pressure                     | 0,94  | 300 | 0,35 | 0,62   | 0,66  | -0,68  | 1,92  |  |  |  |
|   | Pre-ECMO paCO2                                | 1,50  | 300 | 0,13 | 2,74   | 1,82  | -0,84  | 6,31  |  |  |  |
|   | Pre-ECMO paO2/FiO2                            | 0,44  | 300 | 0,66 | 0,89   | 2,01  | -3,07  | 4,84  |  |  |  |
|   | Pre-ECMO Prone positioning                    | 0,12  | 300 | 0,91 | 0,00   | 0,03  | -0,05  | 0,06  |  |  |  |
|   | Pre-ECMO Neuromuscular blockade               | 1,84  | 300 | 0,07 | 0,04   | 0,02  | 0,00   | 0,08  |  |  |  |
|   | Pre-ECMO High-dose corticosteroids            | -0,61 | 300 | 0,54 | -0,03  | 0,05  | -0,12  | 0,06  |  |  |  |
| 9 | All ECMO previous year                        | -2,65 | 300 | 0,01 | -34,31 | 12,93 | -59,76 | -8,86 |  |  |  |
|   | VV-ECMO previous year                         | -3,31 | 300 | 0,00 | -9,13  | 2,76  | -14,57 | -3,70 |  |  |  |
|   | Age                                           | 3,98  | 300 | 0,00 | 4,40   | 1,10  | 2,22   | 6,57  |  |  |  |
|   | BMI                                           | 0,02  | 300 | 0,98 | 0,02   | 0,68  | -1,32  | 1,35  |  |  |  |
|   | Hypertension                                  | 0,75  | 300 | 0,46 | 0,04   | 0,05  | -0,07  | 0,15  |  |  |  |

|    |                                               |       |     |      |        |       |        |       |  |  |  |
|----|-----------------------------------------------|-------|-----|------|--------|-------|--------|-------|--|--|--|
|    | Diabetes                                      | 1,21  | 300 | 0,23 | 0,06   | 0,05  | -0,04  | 0,17  |  |  |  |
|    | Immunocompromised                             | 1,57  | 300 | 0,12 | 0,04   | 0,03  | -0,01  | 0,10  |  |  |  |
|    | Symptoms - ECMO delay                         | 2,58  | 300 | 0,01 | 1,86   | 0,72  | 0,44   | 3,28  |  |  |  |
|    | Orotracheal intubation - ECMO delay           | 3,72  | 300 | 0,00 | 1,60   | 0,43  | 0,75   | 2,44  |  |  |  |
|    | Mobile ECMO Transfer                          | -1,04 | 300 | 0,30 | -0,06  | 0,06  | -0,17  | 0,05  |  |  |  |
|    | Pre-ECMO Cardiovascular component of the SOFA | 0,55  | 300 | 0,58 | 0,11   | 0,20  | -0,29  | 0,52  |  |  |  |
|    | Pre-ECMO Liver component of the SOFA          | 1,49  | 300 | 0,14 | 0,14   | 0,10  | -0,05  | 0,33  |  |  |  |
|    | Pre-ECMO Renal component of the SOFA          | 4,35  | 300 | 0,00 | 0,73   | 0,17  | 0,40   | 1,05  |  |  |  |
|    | Pre-ECMO Plateau pressure                     | 0,77  | 300 | 0,44 | 0,53   | 0,69  | -0,83  | 1,90  |  |  |  |
|    | Pre-ECMO paCO2                                | 1,82  | 300 | 0,07 | 3,30   | 1,81  | -0,27  | 6,87  |  |  |  |
|    | Pre-ECMO paO2/FiO2                            | 0,55  | 300 | 0,58 | 1,13   | 2,04  | -2,88  | 5,13  |  |  |  |
|    | Pre-ECMO Prone positioning                    | 0,12  | 300 | 0,91 | 0,00   | 0,03  | -0,05  | 0,06  |  |  |  |
|    | Pre-ECMO Neuromuscular blockade               | 1,84  | 300 | 0,07 | 0,04   | 0,02  | 0,00   | 0,08  |  |  |  |
|    | Pre-ECMO High-dose corticosteroids            | -0,61 | 300 | 0,54 | -0,03  | 0,05  | -0,12  | 0,06  |  |  |  |
| 10 | All ECMO previous year                        | -2,65 | 300 | 0,01 | -34,31 | 12,93 | -59,76 | -8,86 |  |  |  |

|                                               |       |     |      |       |      |        |       |  |  |  |
|-----------------------------------------------|-------|-----|------|-------|------|--------|-------|--|--|--|
| VV-ECMO previous year                         | -3,31 | 300 | 0,00 | -9,13 | 2,76 | -14,57 | -3,70 |  |  |  |
| Age                                           | 3,98  | 300 | 0,00 | 4,40  | 1,10 | 2,22   | 6,57  |  |  |  |
| BMI                                           | -0,23 | 300 | 0,82 | -0,15 | 0,68 | -1,48  | 1,18  |  |  |  |
| Hypertension                                  | 0,75  | 300 | 0,46 | 0,04  | 0,05 | -0,07  | 0,15  |  |  |  |
| Diabetes                                      | 1,21  | 300 | 0,23 | 0,06  | 0,05 | -0,04  | 0,17  |  |  |  |
| Immunocompromised                             | 1,57  | 300 | 0,12 | 0,04  | 0,03 | -0,01  | 0,10  |  |  |  |
| Symptoms - ECMO delay                         | 2,67  | 300 | 0,01 | 1,91  | 0,71 | 0,50   | 3,32  |  |  |  |
| Orotracheal intubation - ECMO delay           | 3,72  | 300 | 0,00 | 1,60  | 0,43 | 0,75   | 2,44  |  |  |  |
| Mobile ECMO Transfer                          | -1,04 | 300 | 0,30 | -0,06 | 0,06 | -0,17  | 0,05  |  |  |  |
| Pre-ECMO Cardiovascular component of the SOFA | 0,76  | 300 | 0,45 | 0,15  | 0,20 | -0,24  | 0,55  |  |  |  |
| Pre-ECMO Liver component of the SOFA          | 1,56  | 300 | 0,12 | 0,15  | 0,10 | -0,04  | 0,34  |  |  |  |
| Pre-ECMO Renal component of the SOFA          | 3,84  | 300 | 0,00 | 0,65  | 0,17 | 0,31   | 0,98  |  |  |  |
| Pre-ECMO Plateau pressure                     | 0,23  | 300 | 0,82 | 0,15  | 0,67 | -1,16  | 1,47  |  |  |  |
| Pre-ECMO paCO2                                | 1,52  | 300 | 0,13 | 2,76  | 1,82 | -0,82  | 6,33  |  |  |  |
| Pre-ECMO paO2/FiO2                            | 0,50  | 300 | 0,62 | 1,00  | 2,01 | -2,94  | 4,95  |  |  |  |
| Pre-ECMO Prone positioning                    | 0,12  | 300 | 0,91 | 0,00  | 0,03 | -0,05  | 0,06  |  |  |  |

|        |                                                     |       |            |      |        |       |        |       |       |       |       |
|--------|-----------------------------------------------------|-------|------------|------|--------|-------|--------|-------|-------|-------|-------|
|        | Pre-ECMO<br>Neuromuscular blockade                  | 1,84  | 300        | 0,07 | 0,04   | 0,02  | 0,00   | 0,08  |       |       |       |
|        | Pre-ECMO High-dose<br>corticosteroids               | -0,61 | 300        | 0,54 | -0,03  | 0,05  | -0,12  | 0,06  |       |       |       |
| Pooled | All ECMO previous year                              | -2,65 | 300        | 0,01 | -34,31 | 12,93 | -59,76 | -8,86 | 0,000 | 0,000 | 1,000 |
|        | VV-ECMO previous<br>year                            | -3,31 |            | 0,00 | -9,13  | 2,76  | -14,55 | -3,72 | 0,000 | 0,000 | 1,000 |
|        | Age                                                 | 3,98  |            | 0,00 | 4,40   | 1,10  | 2,23   | 6,56  | 0,000 | 0,000 | 1,000 |
|        | BMI                                                 | -0,21 | 1582<br>7  | 0,83 | -0,14  | 0,68  | -1,48  | 1,20  | 0,014 | 0,014 | 0,999 |
|        | Hypertension                                        | 0,75  |            | 0,46 | 0,04   | 0,05  | -0,07  | 0,15  | 0,000 | 0,000 | 1,000 |
|        | Diabetes                                            | 1,21  |            | 0,23 | 0,06   | 0,05  | -0,04  | 0,17  | 0,000 | 0,000 | 1,000 |
|        | Immunocompromised                                   | 1,57  |            | 0,12 | 0,04   | 0,03  | -0,01  | 0,10  | 0,000 | 0,000 | 1,000 |
|        | Symptoms - ECMO<br>delay                            | 2,74  | 4744<br>6  | 0,01 | 1,97   | 0,72  | 0,56   | 3,38  | 0,008 | 0,008 | 0,999 |
|        | Orotracheal intubation -<br>ECMO delay              | 3,72  |            | 0,00 | 1,60   | 0,43  | 0,76   | 2,44  | 0,000 | 0,000 | 1,000 |
|        | Mobile ECMO Transfer                                | -1,08 | 1656<br>49 | 0,28 | -0,06  | 0,06  | -0,17  | 0,05  | 0,004 | 0,004 | 1,000 |
|        | Pre-ECMO<br>Cardiovascular<br>component of the SOFA | 0,54  | 1248       | 0,59 | 0,11   | 0,21  | -0,30  | 0,53  | 0,051 | 0,053 | 0,995 |
|        | Pre-ECMO Liver<br>component of the SOFA             | 1,61  | 1081       | 0,11 | 0,16   | 0,10  | -0,04  | 0,36  | 0,054 | 0,057 | 0,995 |
|        | Pre-ECMO Renal<br>component of the SOFA             | 3,87  | 601        | 0,00 | 0,68   | 0,18  | 0,33   | 1,02  | 0,074 | 0,078 | 0,993 |



|  |                                    |       |      |      |       |      |       |      |       |       |       |
|--|------------------------------------|-------|------|------|-------|------|-------|------|-------|-------|-------|
|  | Pre-ECMO Plateau pressure          | 0,62  | 373  | 0,53 | 0,44  | 0,70 | -0,94 | 1,81 | 0,095 | 0,102 | 0,991 |
|  | Pre-ECMO paCO2                     | 1,55  | 1107 | 0,12 | 2,89  | 1,87 | -0,77 | 6,56 | 0,054 | 0,056 | 0,995 |
|  | Pre-ECMO paO2/FiO2                 | 0,51  | 1074 | 0,61 | 1,06  | 2,07 | -3,01 | 5,12 | 0,055 | 0,057 | 0,995 |
|  | Pre-ECMO Prone positioning         | 0,12  |      | 0,91 | 0,00  | 0,03 | -0,05 | 0,06 | 0,000 | 0,000 | 1,000 |
|  | Pre-ECMO Neuromuscular blockade    | 1,84  |      | 0,07 | 0,04  | 0,02 | 0,00  | 0,08 | 0,000 | 0,000 | 1,000 |
|  | Pre-ECMO High-dose corticosteroids | -0,61 |      | 0,54 | -0,03 | 0,05 | -0,12 | 0,06 | 0,000 | 0,000 | 1,000 |

**Table S3: ECMO consoles used.**

| Company      | GETINGE    |           | Medtronic  | LIVANOVA  |          | XENIOS    |          |
|--------------|------------|-----------|------------|-----------|----------|-----------|----------|
| Console      | Cardiohelp | Rotaflow  | Biomedicus | SCPC      | Lifebox  | DS        | ECCO2R   |
| <b>Total</b> | <b>18</b>  | <b>62</b> | <b>11</b>  | <b>31</b> | <b>2</b> | <b>37</b> | <b>4</b> |

**Table S4: Characteristics of the ECMO centres**

| Centre | University hospital | Cardiothoracic centre | Mobile ECMO team | VV ECMO 2019 | ECMO COVID-19 patients | ICU beds      |               |
|--------|---------------------|-----------------------|------------------|--------------|------------------------|---------------|---------------|
|        |                     |                       |                  |              |                        | before crisis | during crisis |
| 1      | Yes                 | Yes                   | Yes              | 59           | 79                     | 107           | 294           |
| 2      | Yes                 | Yes                   | No               | 3            | 4                      | 19            | 82            |
| 3      | Yes                 | No                    | No               | 6            | 22                     | 35            | 73            |
| 4      | Yes                 | Yes                   | Yes              | 15           | 28                     | 34            | 60            |
| 5      | No                  | Yes                   | No               | 2            | 11                     | 14            | 35            |
| 6      | No                  | No                    | No               | 3            | 9                      | 18            | 32            |
| 7      | No                  | Yes                   | Yes              | 64           | 8                      | 23            | 35            |
| 8      | No                  | No                    | No               | 2            | 7                      | 22            | 60            |
| 9      | Yes                 | Yes                   | Yes              | 13           | 52                     | 67            | 120           |
| 10     | No                  | Yes                   | Yes              | 53           | 14                     | 14            | 56            |
| 11     | No                  | No                    | No               | 6            | 4                      | 15            | 50            |
| 12     | Yes                 | Yes                   | No               | 5            | 10                     | 25            | 59            |
| 13     | No                  | Yes                   | No               | 2            | 4                      | 30            | 50            |
| 14     | No                  | Yes                   | Yes              | 3            | 11                     | 20            | 41            |
| 15     | Yes                 | No                    | No               | 7            | 16                     | 12            | 28            |
| 16     | Yes                 | No                    | No               | 2            | 13                     | 14            | 40            |
| 17     | Yes                 | No                    | No               | 12           | 10                     | 32            | 95            |

ECMO=extracorporeal membrane oxygenation. VV=venovenous.

**Table S5: Centre comparison on demographic, clinical, and ventilatory support characteristics of the patients' overall and according to survival status 90 days after ECMO**

| Characteristic                           | N   | All patients<br>(N=302) | Survival status 90 days after ECMO |                                 |                  |                                 |
|------------------------------------------|-----|-------------------------|------------------------------------|---------------------------------|------------------|---------------------------------|
|                                          |     |                         | Alive                              |                                 | Dead             |                                 |
|                                          |     |                         | (n=138)                            | p-value<br>(between<br>centres) | (n=164)          | p-value<br>(between<br>centres) |
| Age (years)                              | 302 | 52 (45–58)              | 49 (42–56)                         | ns                              | 54 (48–60)       | ns                              |
| Men                                      | 302 | 235 (78%)               | 103 (75%)                          | ns                              | 132 (81%)        | ns                              |
| Body mass index (kg/cm <sup>2</sup> )    | 298 | 29.7 (26.8–33.5)        | 30.0 (26.5–33.4)                   | ns                              | 29.6 (27.1–33.7) | ns                              |
| SAPS-II                                  | 289 | 40 (31–56)              | 41 (31–55)                         | ns                              | 39 (31–57)       | ns                              |
| Total SOFA score                         | 281 | 12 (9-14)               | 12 (9-13)                          | ns                              | 12 (10-15)       | <0.01                           |
| Renal component $\geq 3$                 | 285 | 60 (20%)                | 17 (12%)                           | ns                              | 43 (26%)         | ns                              |
| Cardiovascular component $\geq 3$        | 284 | 149 (49%)               | 68 (49%)                           | ns                              | 81 (49%)         | ns                              |
| Comorbid conditions                      |     |                         |                                    |                                 |                  |                                 |
| Hypertension                             | 302 | 103 (34%)               | 44 (32%)                           | ns                              | 59 (36%)         | ns                              |
| Diabetes                                 | 302 | 87 (29%)                | 35 (25%)                           | ns                              | 52 (32%)         | ns                              |
| Ischaemic cardiomyopathy                 | 302 | 10 (3%)                 | 2 (2%)                             | ns                              | 8 (5%)           | ns                              |
| Chronic respiratory disease <sup>†</sup> | 302 | 34 (11%)                | 19 (14%)                           | ns                              | 15 (9%)          | ns                              |
| Active smoker                            | 302 | 11 (4%)                 | 2 (2%)                             | ns                              | 9 (5%)           | 0.01                            |
| Immunocompromised <sup>‡</sup>           | 302 | 18 (6%)                 | 5 (4%)                             | ns                              | 13 (8%)          | ns                              |
| Delays (days)                            |     |                         |                                    |                                 |                  |                                 |
| First symptoms to ECMO                   | 295 | 14 (11–18)              | 13 (10–17)                         | 0.035                           | 14 (11–19)       | ns                              |
| Hospitalisation to ECMO                  | 302 | 7 (5–10)                | 6 (4–9)                            | ns                              | 7 (5–11)         | ns                              |
| Intubation to ECMO                       | 302 | 5 (3–7)                 | 4 (2–6)                            | ns                              | 5 (3–8)          | ns                              |

| Characteristic                                        | N   | All patients<br>(N=302) | Survival status 90 days after ECMO |                                 |                  |                                 |
|-------------------------------------------------------|-----|-------------------------|------------------------------------|---------------------------------|------------------|---------------------------------|
|                                                       |     |                         | Alive                              |                                 | Dead             |                                 |
|                                                       |     |                         | (n=138)                            | p-value<br>(between<br>centres) | (n=164)          | p-value<br>(between<br>centres) |
| Transfer on ECMO by MERT from another hospital, n (%) | 302 | 113 (37%)               | 56 (41%)                           | ns                              | 57 (35%)         | ns                              |
| Ventilation parameters                                |     |                         |                                    |                                 |                  |                                 |
| FiO <sub>2</sub> (mm Hg)                              | 296 | 100 (100–100)           | 100 (100–100)                      | <0.01                           | 100 (100–100)    | <0.01                           |
| PEEP (cm H <sub>2</sub> O)                            | 276 | 12 (10–14)              | 12 (10–14)                         | ns                              | 12 (10–14)       | ns                              |
| Tidal volume (mL/kg PBW)                              | 260 | 5.6 (4.9–6.2)           | 5.8 (5.1–6.3)                      | ns                              | 5.6 (4.7–6.1)    | 0.02                            |
| Respiratory rate (breaths/min)                        | 245 | 28 (26–30)              | 29 (26–30)                         | <0.01                           | 28 (26–30)       | <0.01                           |
| Plateau pressure (cm H <sub>2</sub> O)                | 252 | 30 (27–32)              | 30 (27–32)                         | ns                              | 30 (26–34)       | ns                              |
| Driving pressure (cm H <sub>2</sub> O)                | 251 | 18 (14–21)              | 18 (15–20)                         | ns                              | 18 (14–22)       | ns                              |
| Last blood-gas values pre-ECMO                        |     |                         |                                    |                                 |                  |                                 |
| pH                                                    | 247 | 7.31 (7.23–7.37)        | 7.32 (7.26–7.38)                   | ns                              | 7.29 (7.21–7.35) | ns                              |
| PaO <sub>2</sub> /FiO <sub>2</sub>                    | 294 | 61 (54–70)              | 61 (53–70)                         | ns                              | 60 (54–72)       | ns                              |
| PaCO <sub>2</sub> (mm Hg)                             | 286 | 57 (48–67)              | 56 (47–66)                         | ns                              | 58 (50–68)       | ns                              |
| Plasma bicarbonate lactate (mmol/L)                   | 273 | 28 (24–32)              | 28 (24–32)                         | ns                              | 28 (24–32)       | ns                              |
| SaO <sub>2</sub> (%)                                  | 262 | 88 (83–92)              | 88 (82–92)                         | ns                              | 88 (83–92)       | ns                              |
| Arterial lactate (mmol/L)                             | 276 | 1.7 (1.3–2.2)           | 1.7 (1.2–2.1)                      | ns                              | 1.7 (1.4–2.3)    | ns                              |
| Laboratory values                                     |     |                         |                                    |                                 |                  |                                 |
| White-cell count (g/L)                                | 281 | 12.8 (9.6–16.6)         | 11.6 (9.3–15.5)                    | ns                              | 14.1 (10.0–17.2) | ns                              |

| Characteristic                       | N   | All patients<br>(N=302) | Survival status 90 days after ECMO |                                 |               |                                 |
|--------------------------------------|-----|-------------------------|------------------------------------|---------------------------------|---------------|---------------------------------|
|                                      |     |                         | Alive                              |                                 | Dead          |                                 |
|                                      |     |                         | (n=138)                            | p-value<br>(between<br>centres) | (n=164)       | p-value<br>(between<br>centres) |
| Lymphocytes (g/L)                    | 247 | 0.9 (0.6–1.3)           | 0.9 (0.6–1.5)                      | ns                              | 1.0 (0.6–1.3) | ns                              |
| Serum creatinine (µmol/L)            | 270 | 83 (62–155)             | 69 (56–101)                        | ns                              | 96 (71–216)   | ns                              |
| Serum bilirubin (µmol/L)             | 268 | 13 (8–22)               | 12 (8–25)                          | ns                              | 15 (8–21)     | ns                              |
| Haematocrit (%)                      | 273 | 30 (26–35)              | 31 (27–36)                         | ns                              | 30 (25–35)    | ns                              |
| Rescue therapy pre-ECMO, n (%)       |     |                         |                                    |                                 |               |                                 |
| Neuromuscular blockade               | 302 | 291 (96%)               | 130 (94%)                          | ns                              | 161 (98%)     | ns                              |
| Prone positioning                    | 302 | 285 (94%)               | 130 (94%)                          | ns                              | 155 (95%)     | ns                              |
| Inhaled nitric oxide or prostacyclin | 302 | 169 (56%)               | 58 (42%)                           | <0.01                           | 101 (62%)     | <0.01                           |
| Steroids                             | 302 | 61 (20%)                | 30 (22%)                           | <0.01                           | 31 (19%)      | ns                              |
| Renal-replacement therapy            | 302 | 37 (12%)                | 6 (4%)                             | ns                              | 31 (19%)      | ns                              |

Data are median (interquartile range) or number (%). ECMO=extracorporeal membrane oxygenation. FiO<sub>2</sub>=fraction of inspired oxygen. Fem=femoral. ICU=intensive care unit. MERT=Fr French, Jug jugular, Mobile ECMO Retrieval Team. PaO<sub>2</sub>/FiO<sub>2</sub>=ratio of the partial pressure of arterial oxygen to the fraction of inspired oxygen. PEEP=positive end-expiratory pressure. PBW=predicted body weight. PaO<sub>2</sub>=partial pressure of arterial oxygen. PaCO<sub>2</sub>=partial pressure of arterial carbon dioxide. SaO<sub>2</sub>=arterial oxygen saturation. SAPS=Simplified Acute Physiology Score. SOFA=Sequential Organ-Function Assessment. ns =non-significant

†Chronic obstructive pulmonary disease or asthma.

‡Haematological malignancies, active solid tumour, or having received specific anti-tumour treatment within 1 year, solid-organ transplant or human immunodeficiency virus-infected, long-term corticosteroids or immunosuppressants.

§Plateau pressure minus PEEP.

**Figure S1: The four steps of the Greater Paris extracorporeal membrane oxygenation network organisation**

ECMO=extracorporeal membrane oxygenation. ICU=intensive care unit.

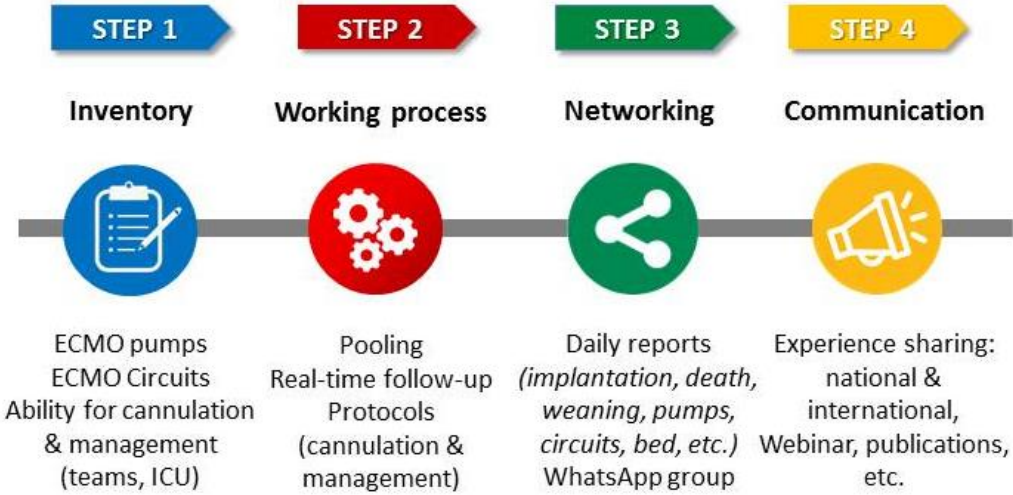

## Figure S2: Principal component analysis (PCA) and correlation clustering

A. Overview of PCA, displaying pairwise score plot for top five components separating alive and dead. B. Component 1 capturing the largest variation, separating the groups by 9.7%. C. The PCA loading features are clustered by Pearson correlation, presenting two distinct clusters (Cluster I and Cluster II, positively and negatively correlated to 90-day survival, respectively). ECMO=extracorporeal membrane oxygenation.

\*PCA is a mathematical algorithm that reduces the dimensionality of the data, by the transformation of larger variable sets into small sets that retain most of the information in the large set. The first principal component explains the highest variability in the data and each of the succeeding component accounts for the remaining variability in the dataset. Each dot in the figure represents individual patients (red for dead and blue for alive), the circle around both of these groups are 95% confidence regions. The variables that separate these groups are then clustered to find the inter- and intra-relationship of the features for the outcome; survival and death.

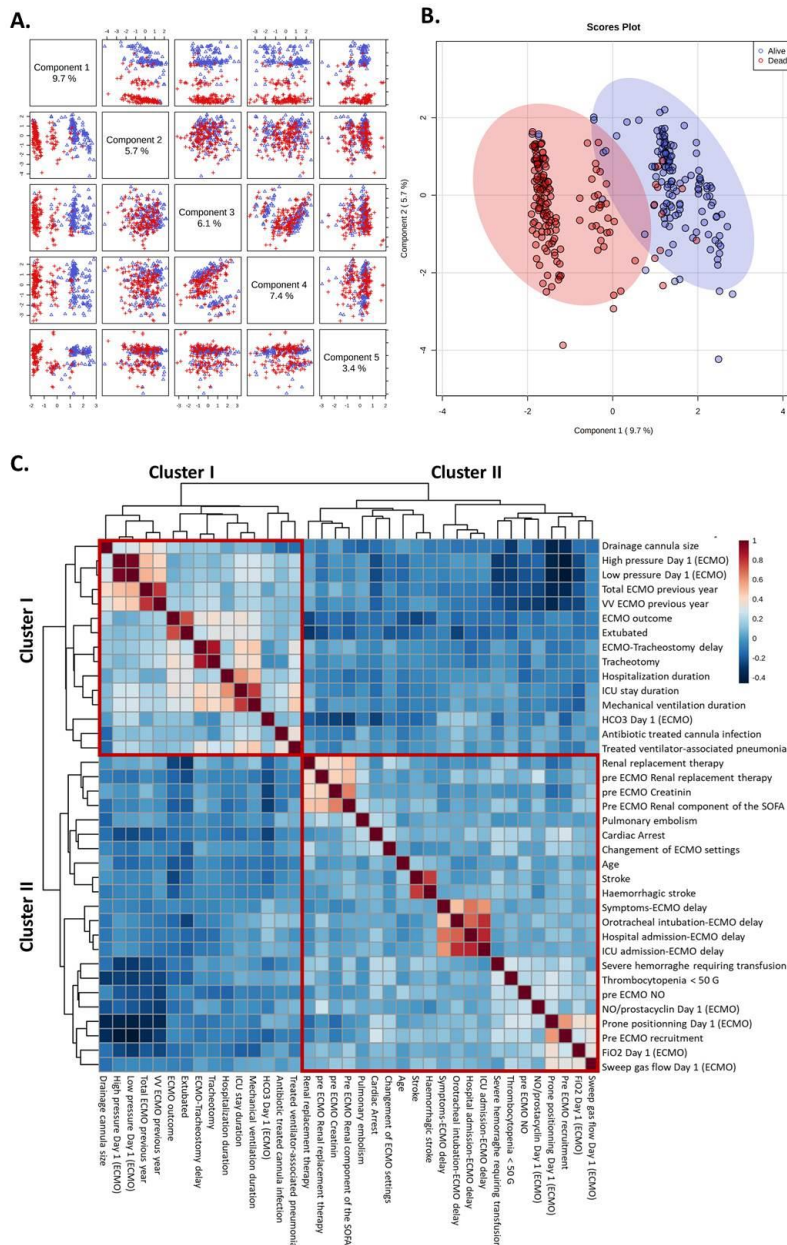

**Figure S3: Number of phone calls (n=575) requesting extracorporeal membrane oxygenation (23 March to 11 May 2020)**

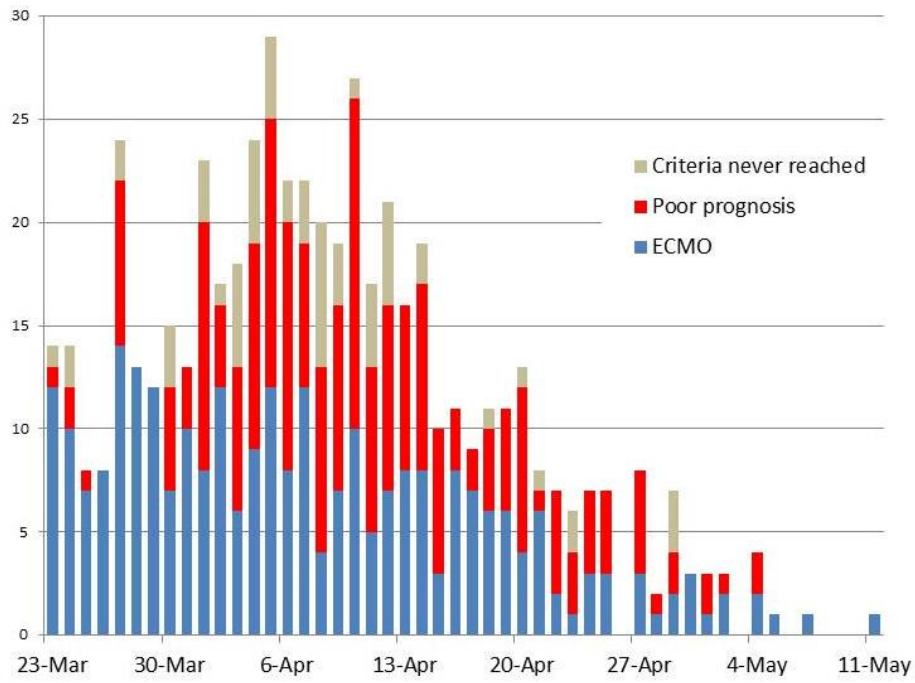



**Figure S4: Map of the Greater Paris reporting the mobile extracorporeal membrane oxygenation team activity, and the number of hospitals where patients were cannulated**

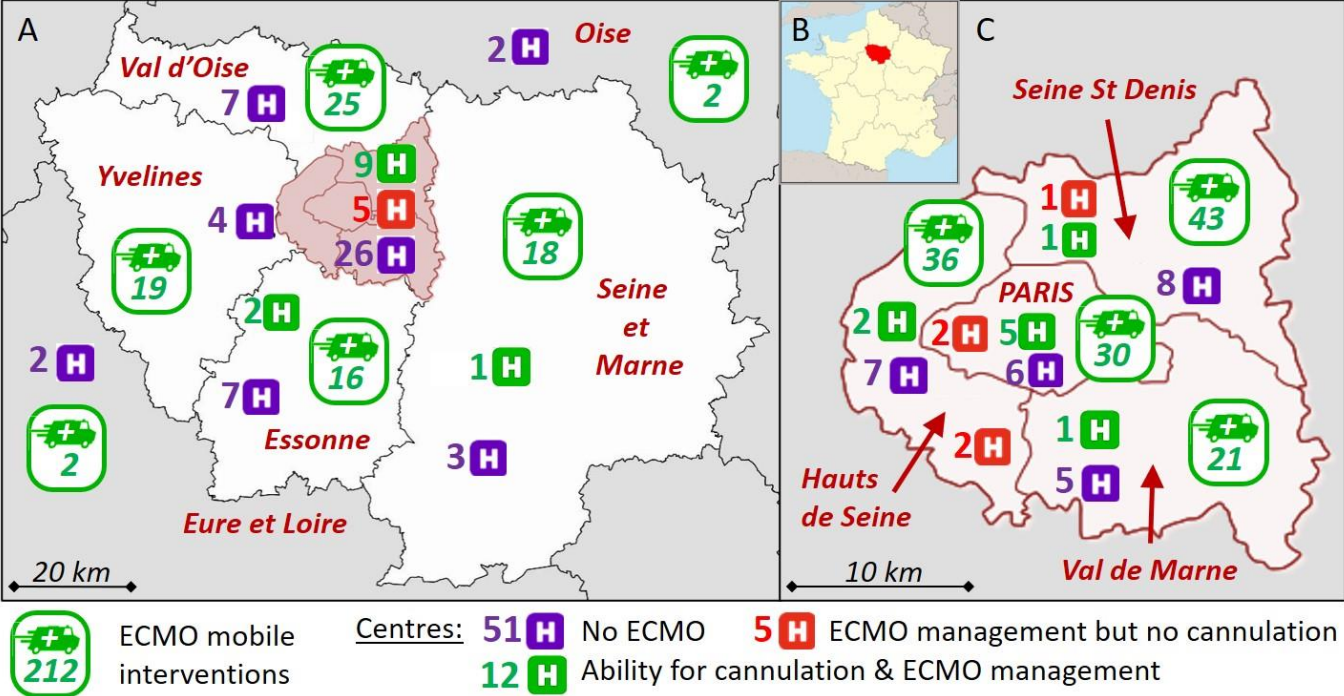

**Figure S5: Numbers of extracorporeal membrane oxygenation implantations and transfers for each mobile ECMO team (designated in the figure as A to F)**

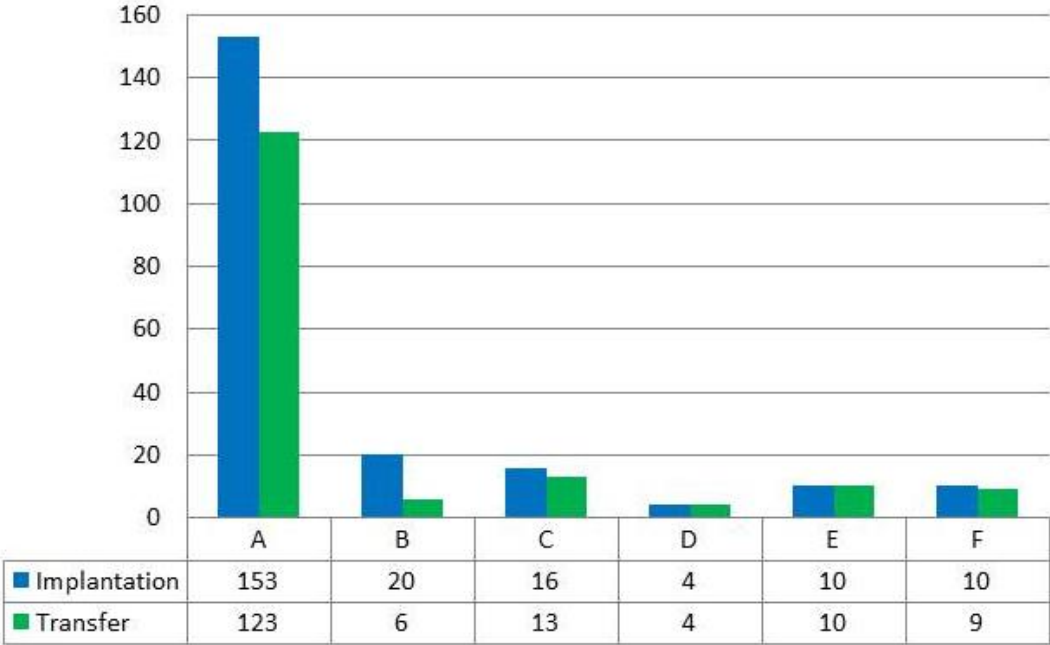

### Figure S6: Random forest (RF) classified features

Features are ranked by their contributions to classification accuracy (mean decrease accuracy) which is a measure of permutation importance of the predictors. The top features are the major independent predictors that classify the classes (outcome at day 90). RF has accurately predicted the four features (above the dotted blue line) that were identified by the multivariable analysis.

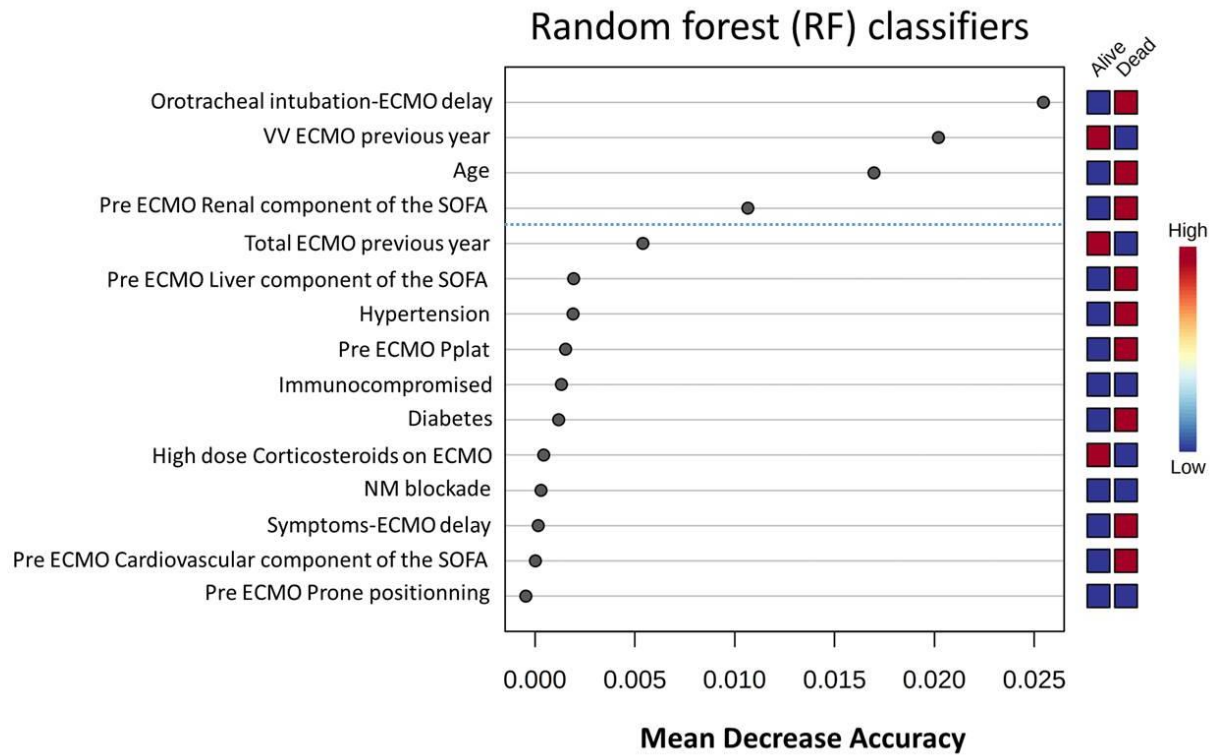

## Figure S7: Boxplots of the features used in the random forest machine-learning algorithm

Boxplots of both the original and the normalized values depicting each patient are presented along with their p values.

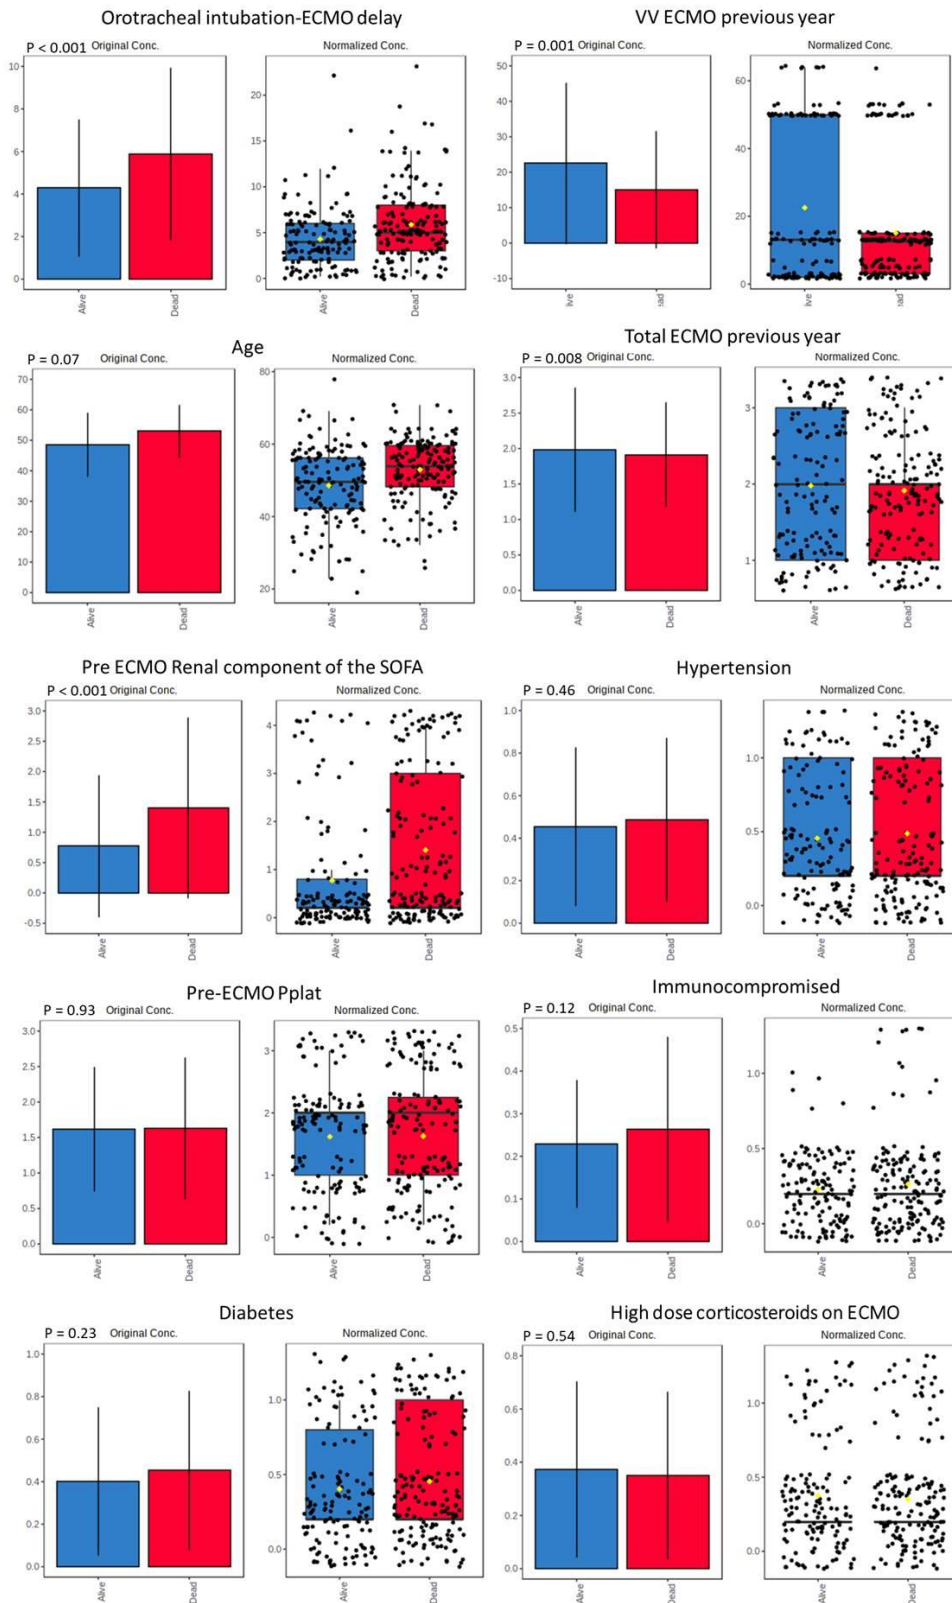

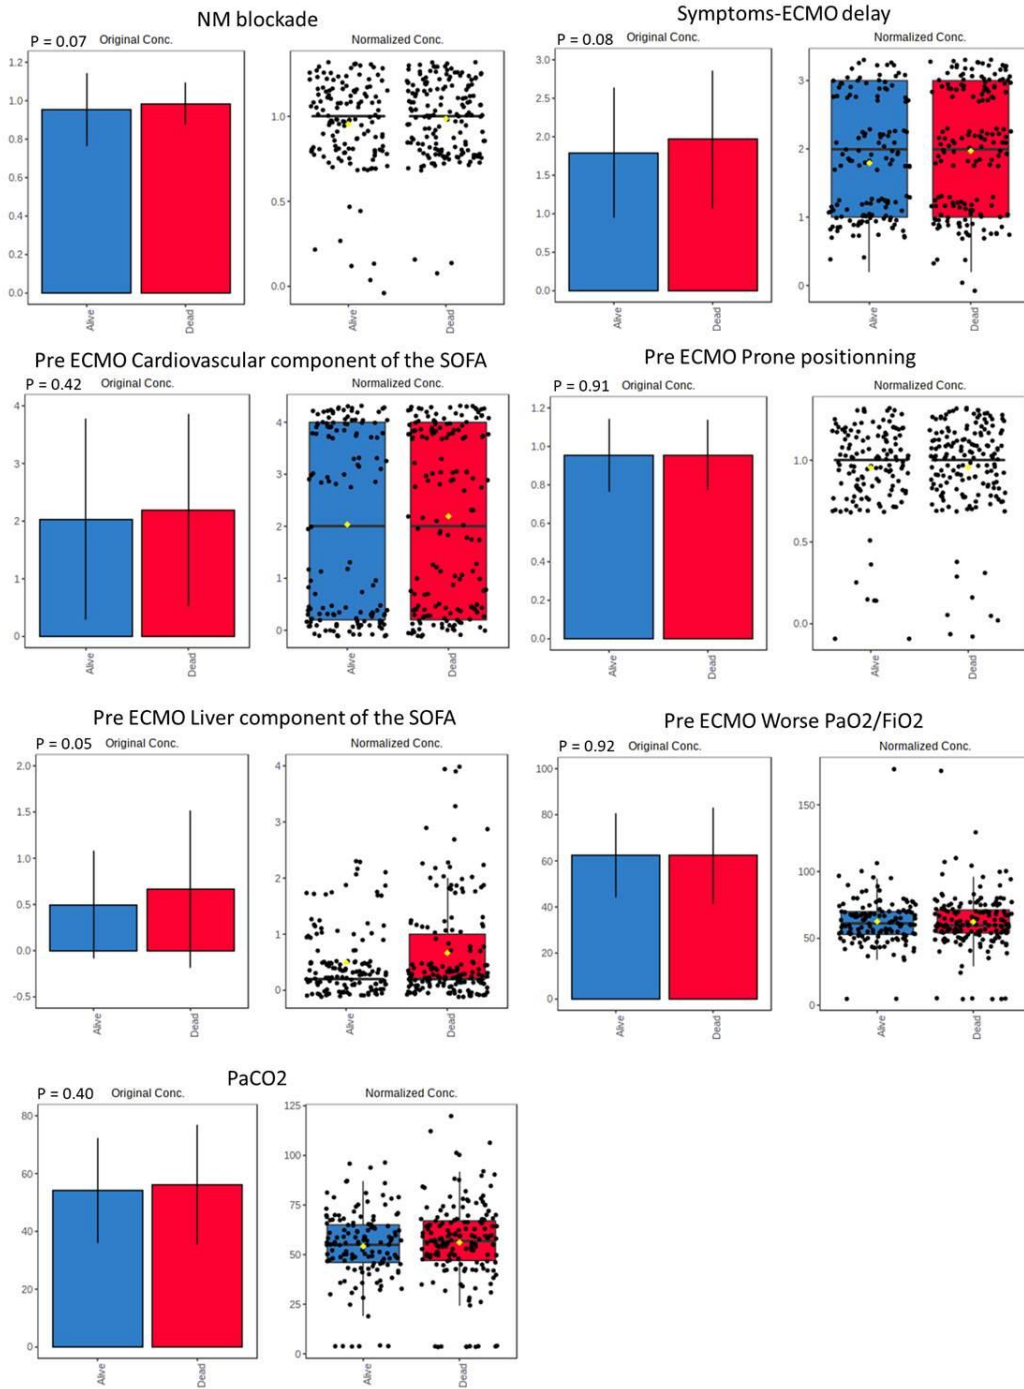

**Figure S8: Area under the curve (AUC) of receiving operating characteristic (ROC) curves.**

The AUC ROC of 0.62 (95% CI 0.55–0.68) shows an overall good model quality, with a  $p < 0.001$ .

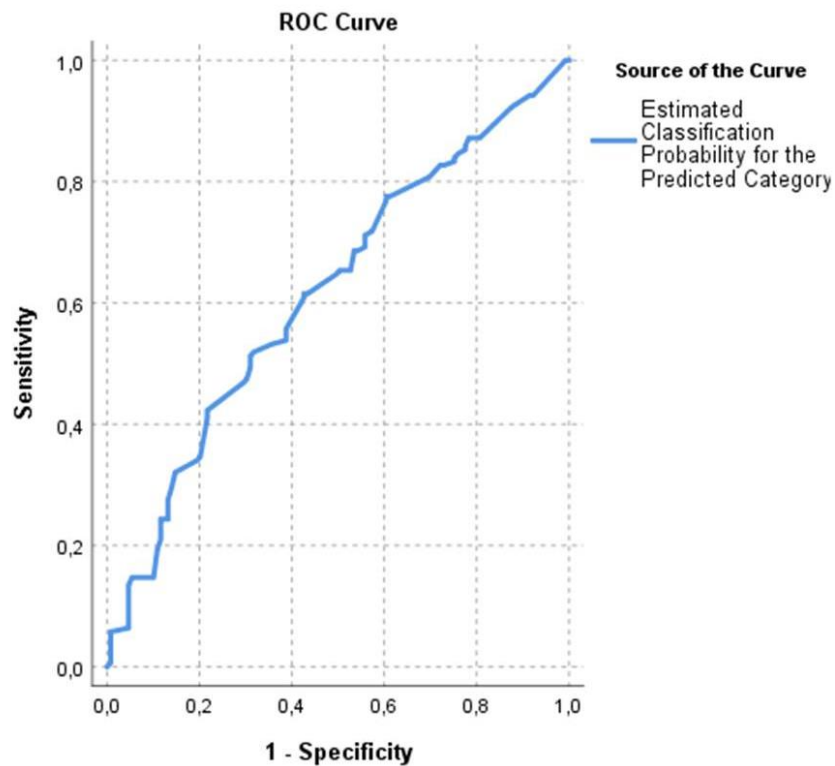

| Area Under the ROC Curve                                        |       |            |                 |                                    |             |
|-----------------------------------------------------------------|-------|------------|-----------------|------------------------------------|-------------|
| Test Result Variable(s)                                         | Area  | Std. Error | Asymptotic Sig. | Asymptotic 95% Confidence Interval |             |
|                                                                 |       |            |                 | Lower Bound                        | Upper Bound |
| Estimated Classification Probability for the Predicted Category | 0.617 | 0.033      | <0.001          | 0.552                              | 0.682       |

**Figure S9: Scatter plot for Age (A), orotracheal intubation-ECMO delay (B), symptoms-ECMO delay (C), pre-ECMO plateau pressure (D), total ECMO (E) and VV-ECMO previous year (F), BMI (G), components of SOFA score (H: cardiovascular, I: renal, J: liver), and pre-ECMO PCO<sub>2</sub> (K) and PaO<sub>2</sub>/FiO<sub>2</sub> (L).**  
 ECMO=extracorporeal membrane oxygenation.

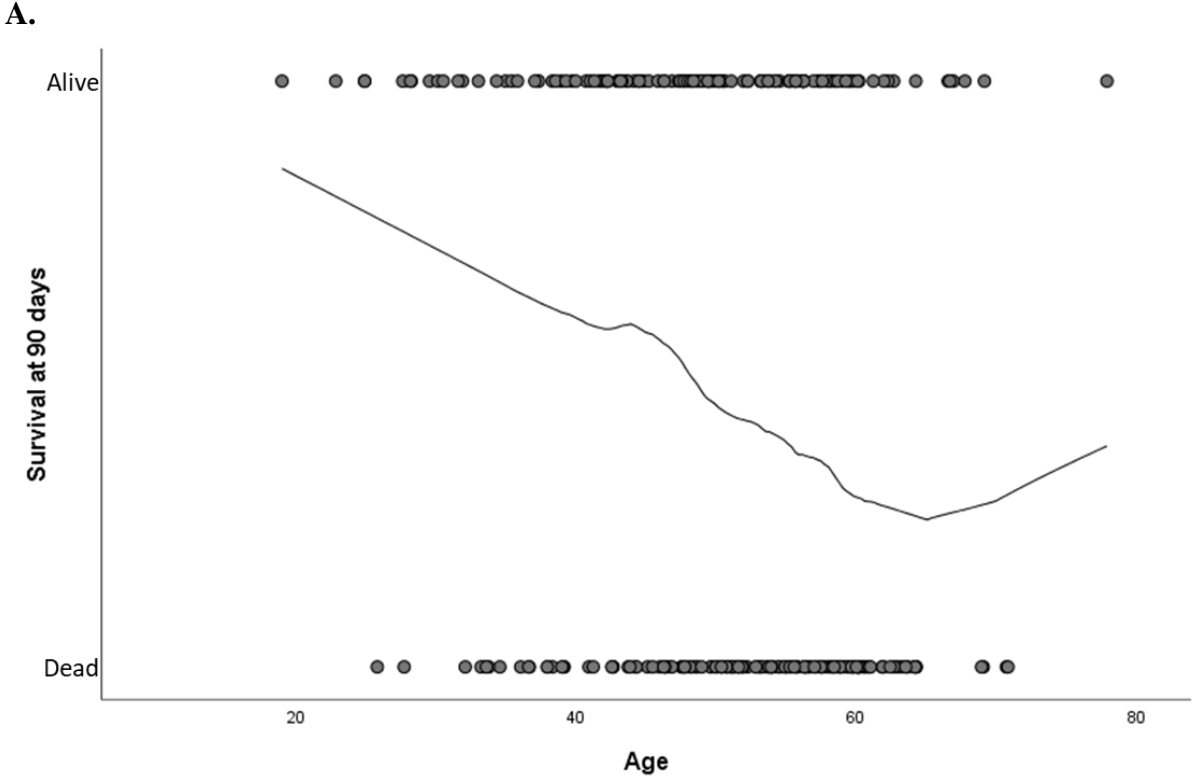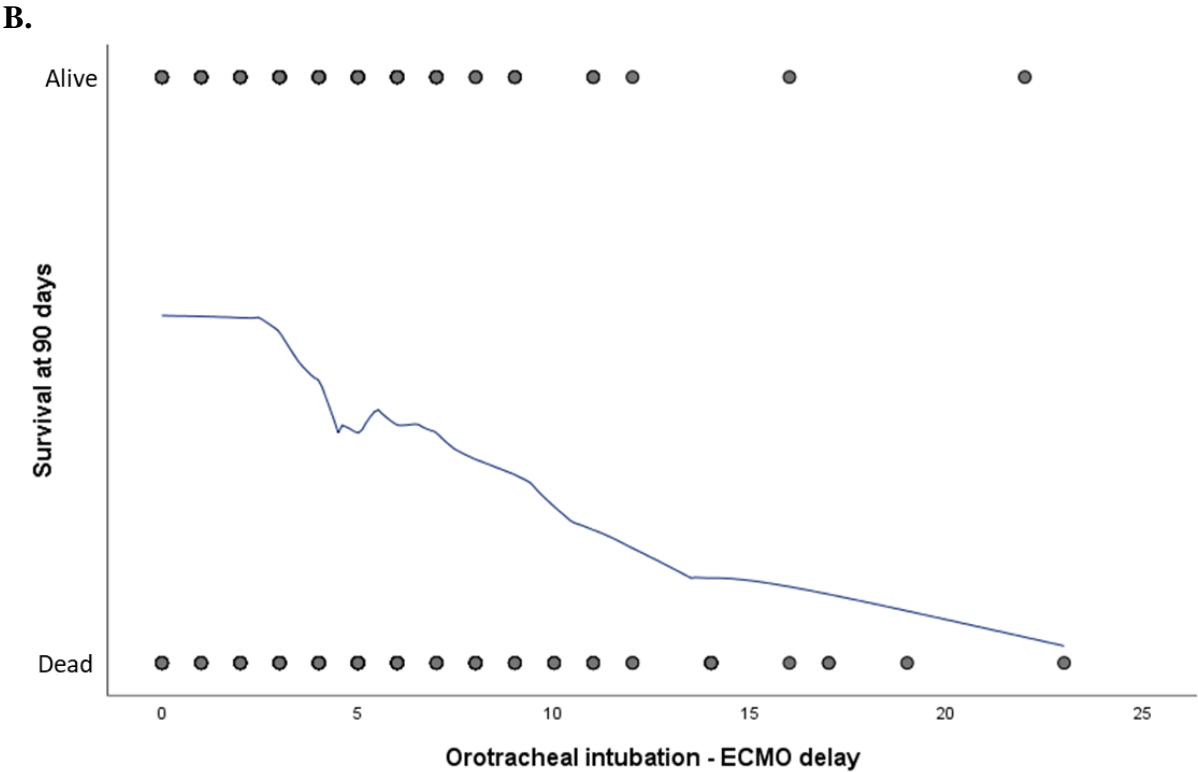

C.

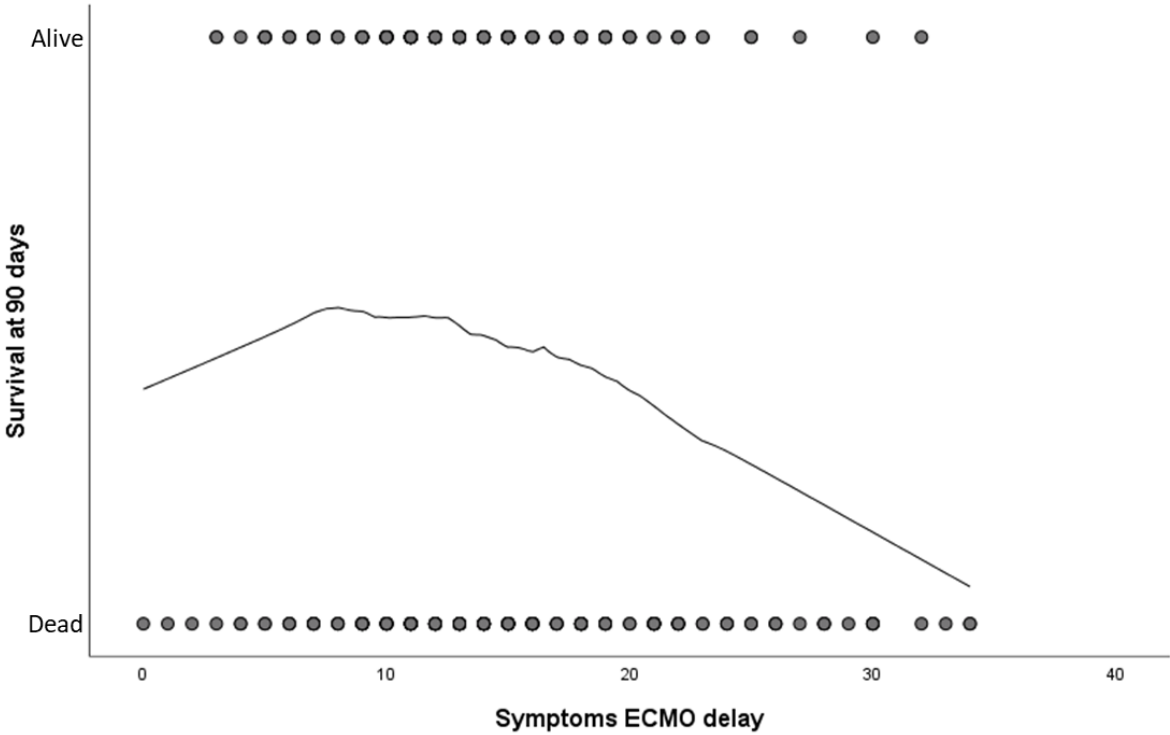

D.

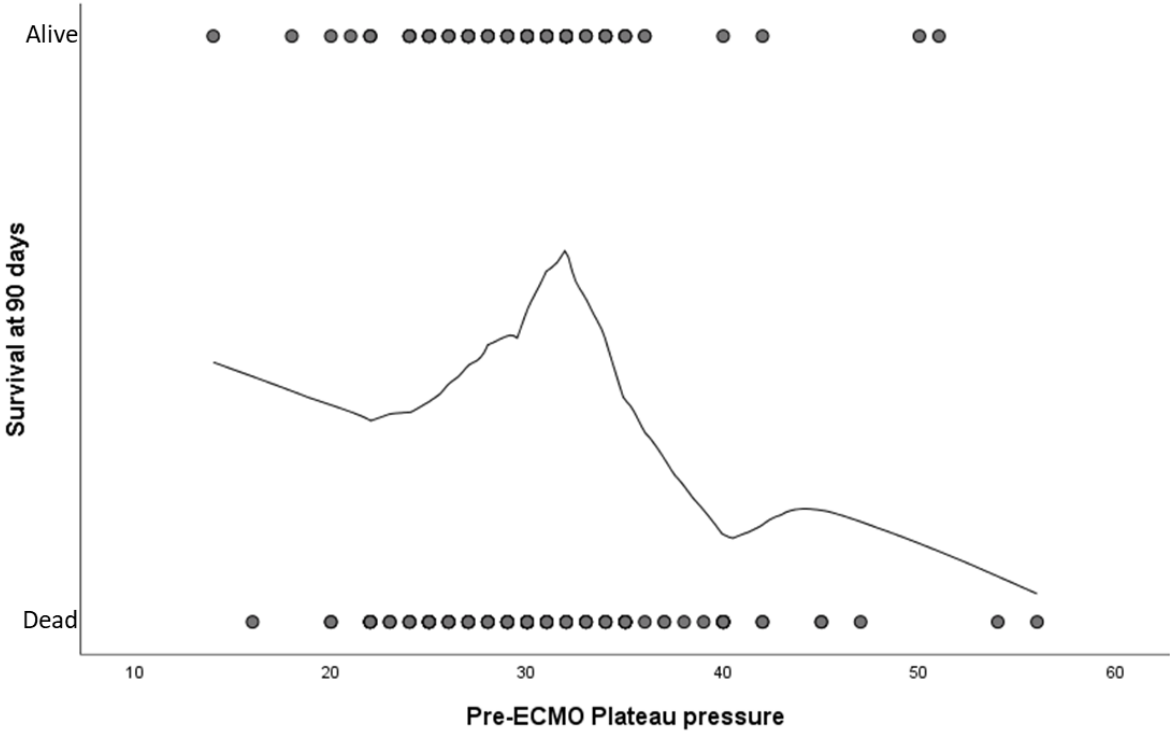



**E.**

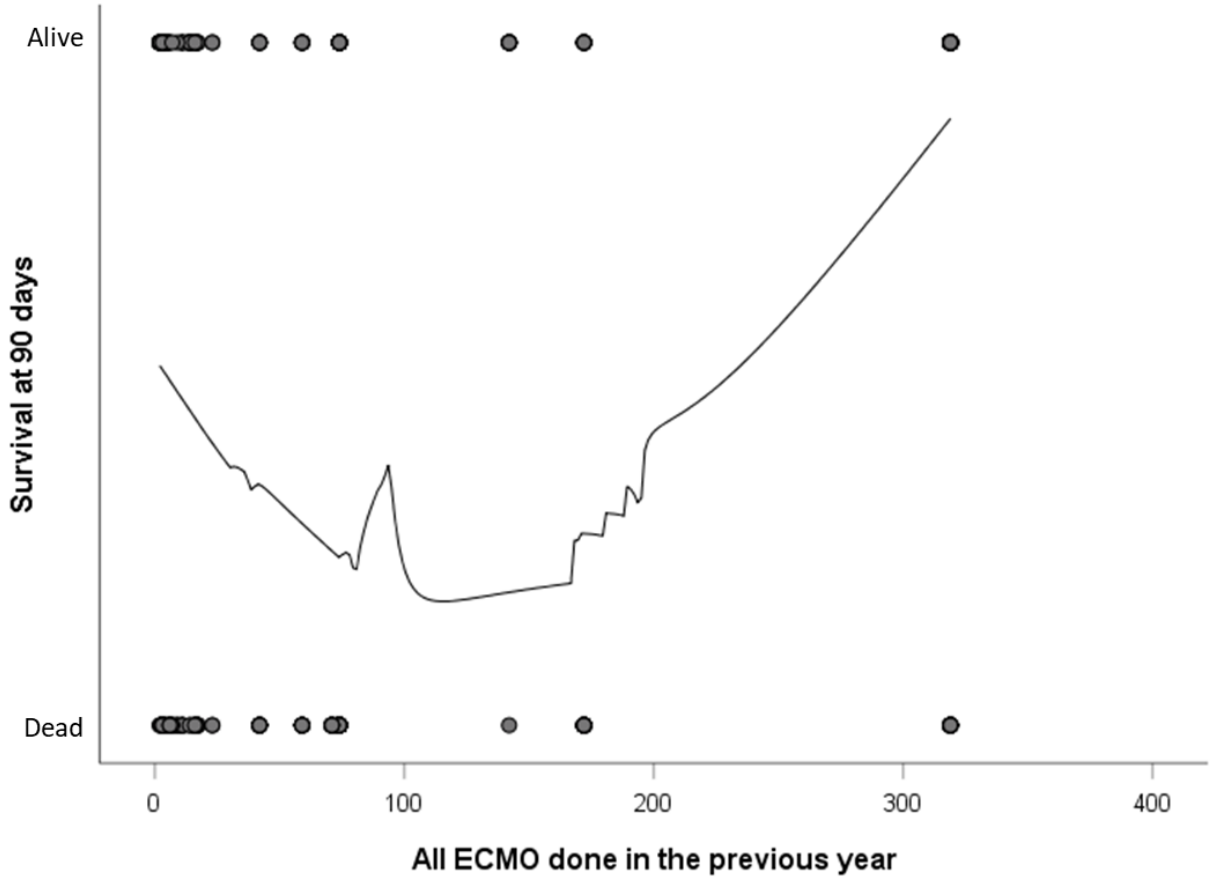

**F.**

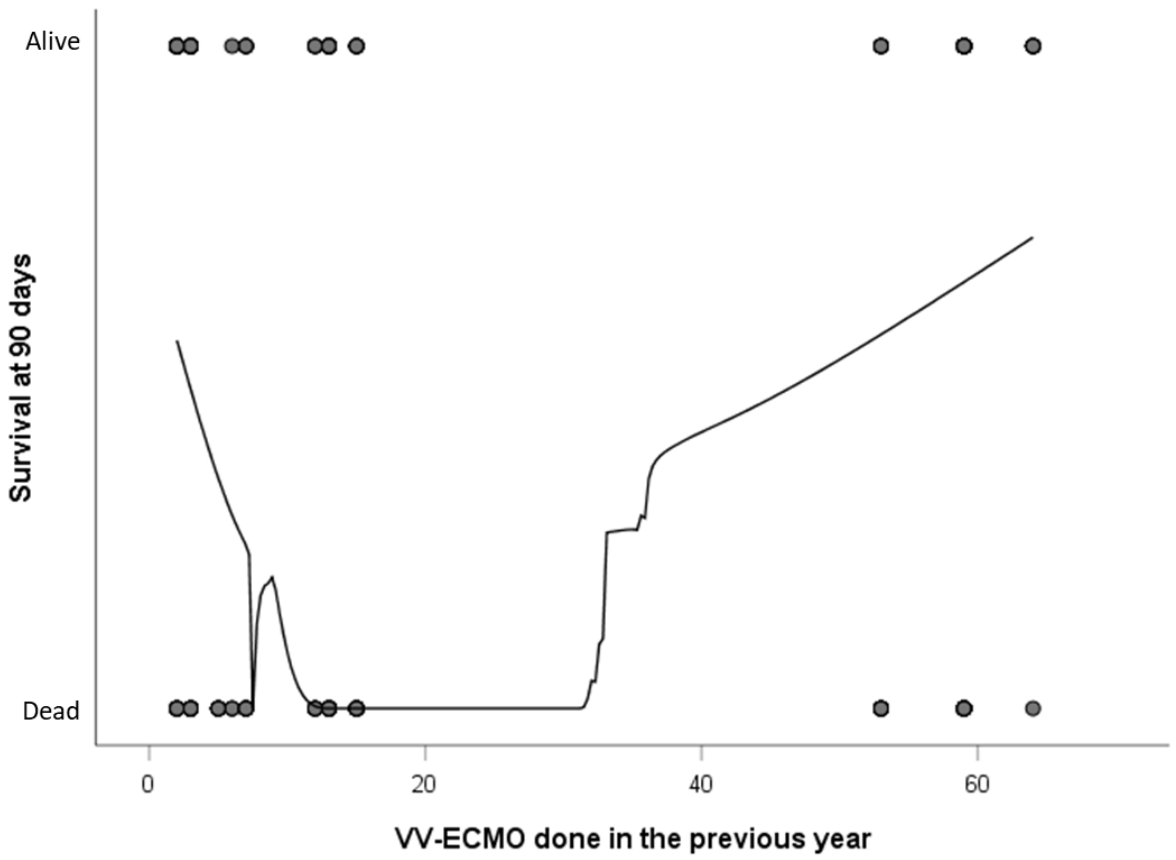

G.

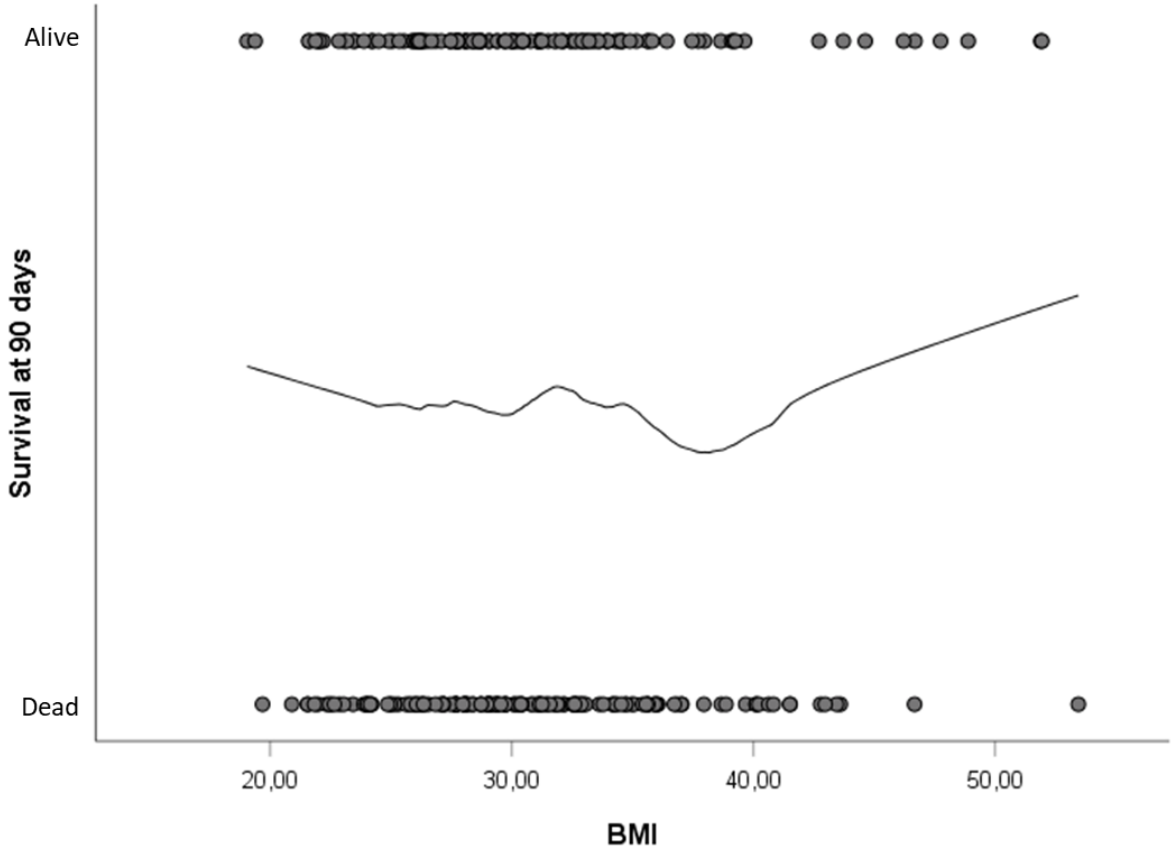

H.

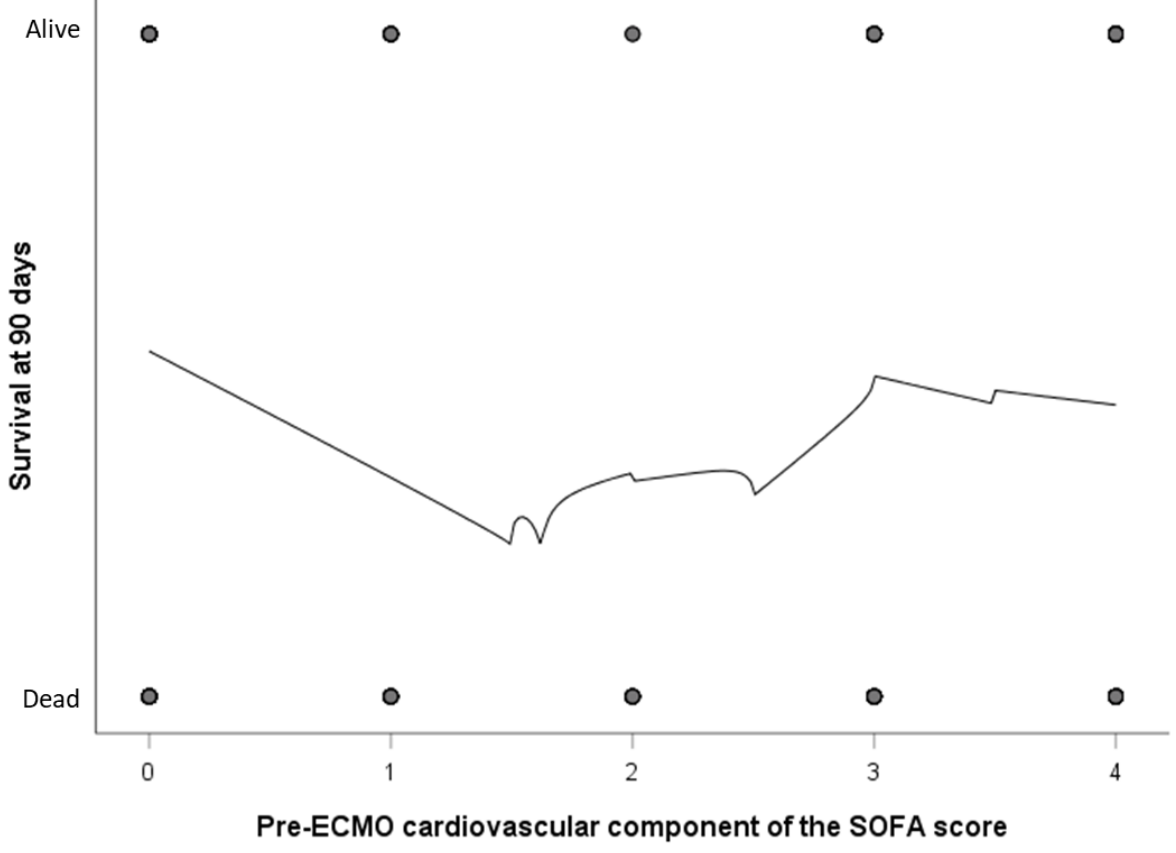

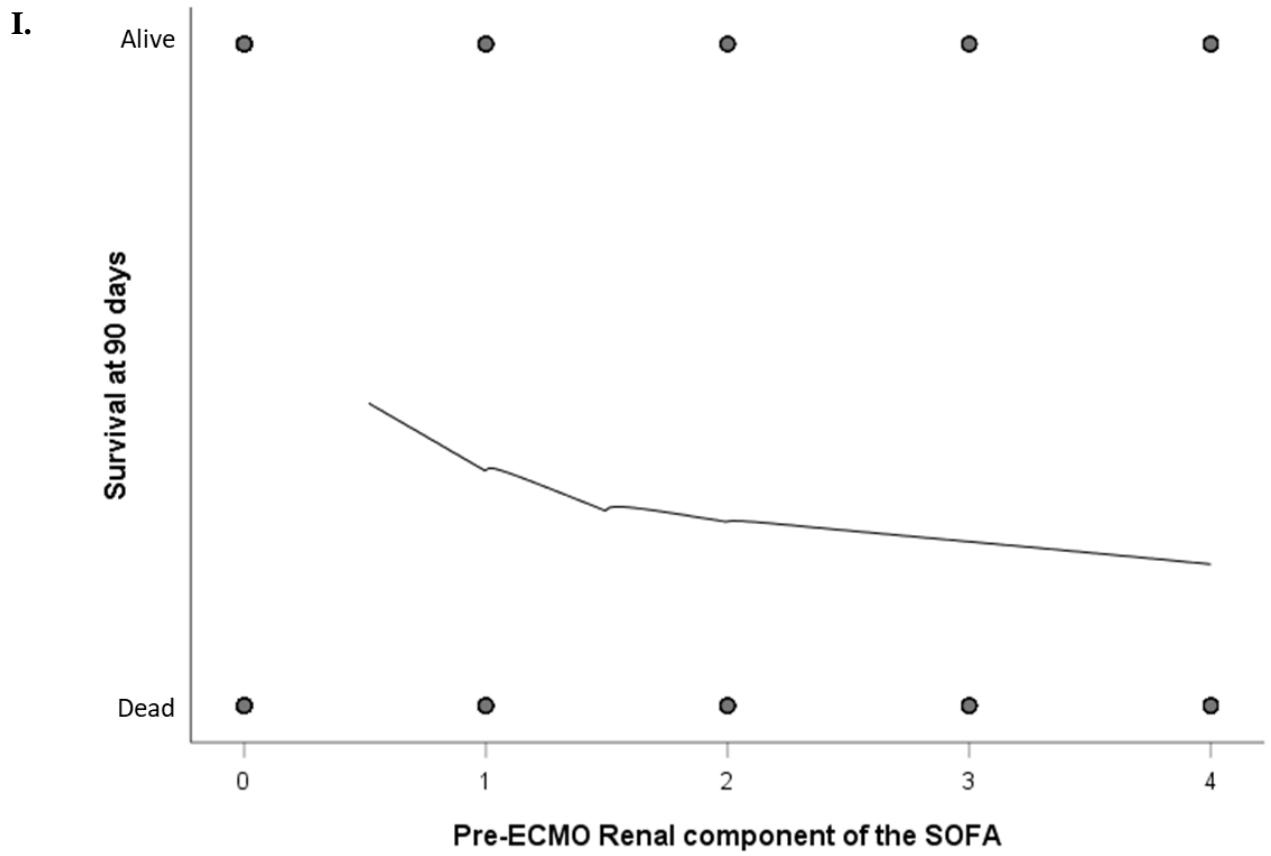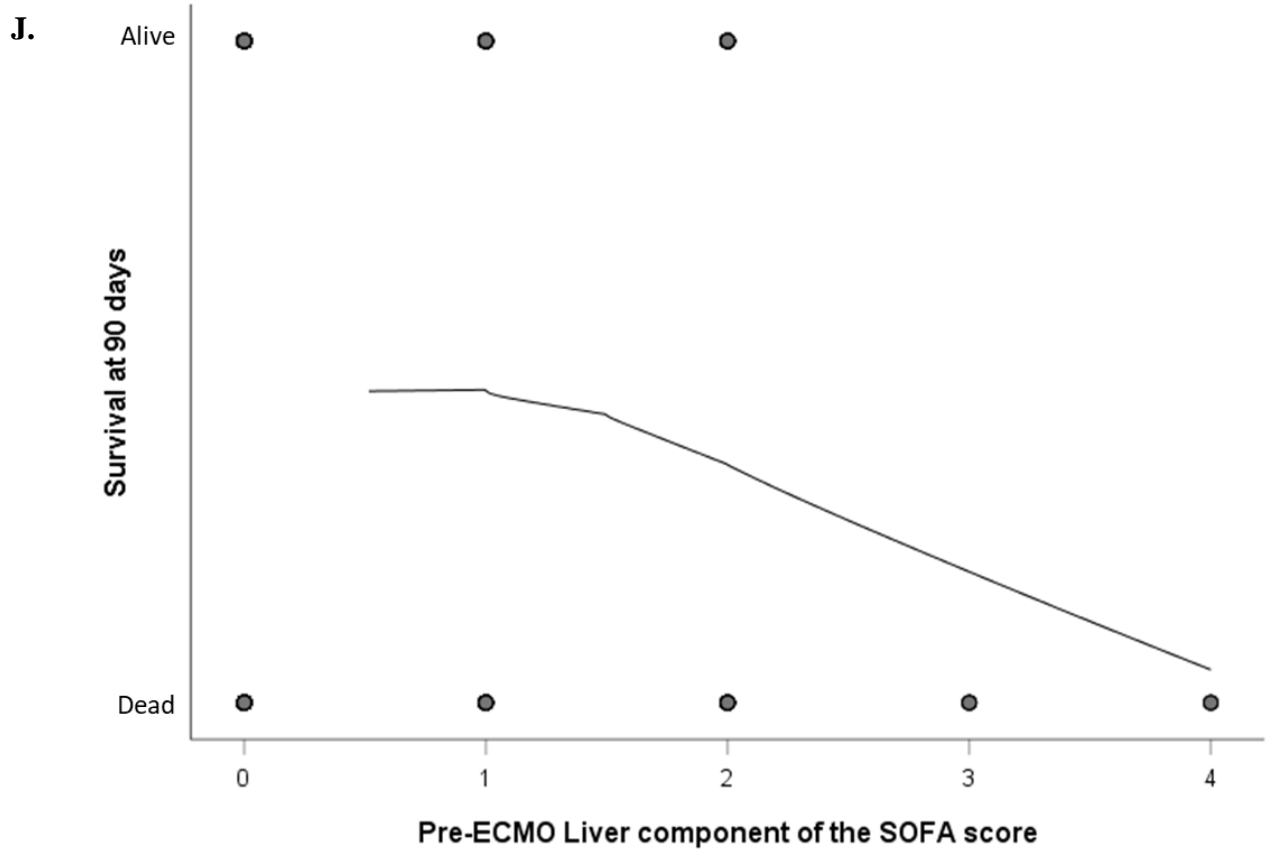

**K.**

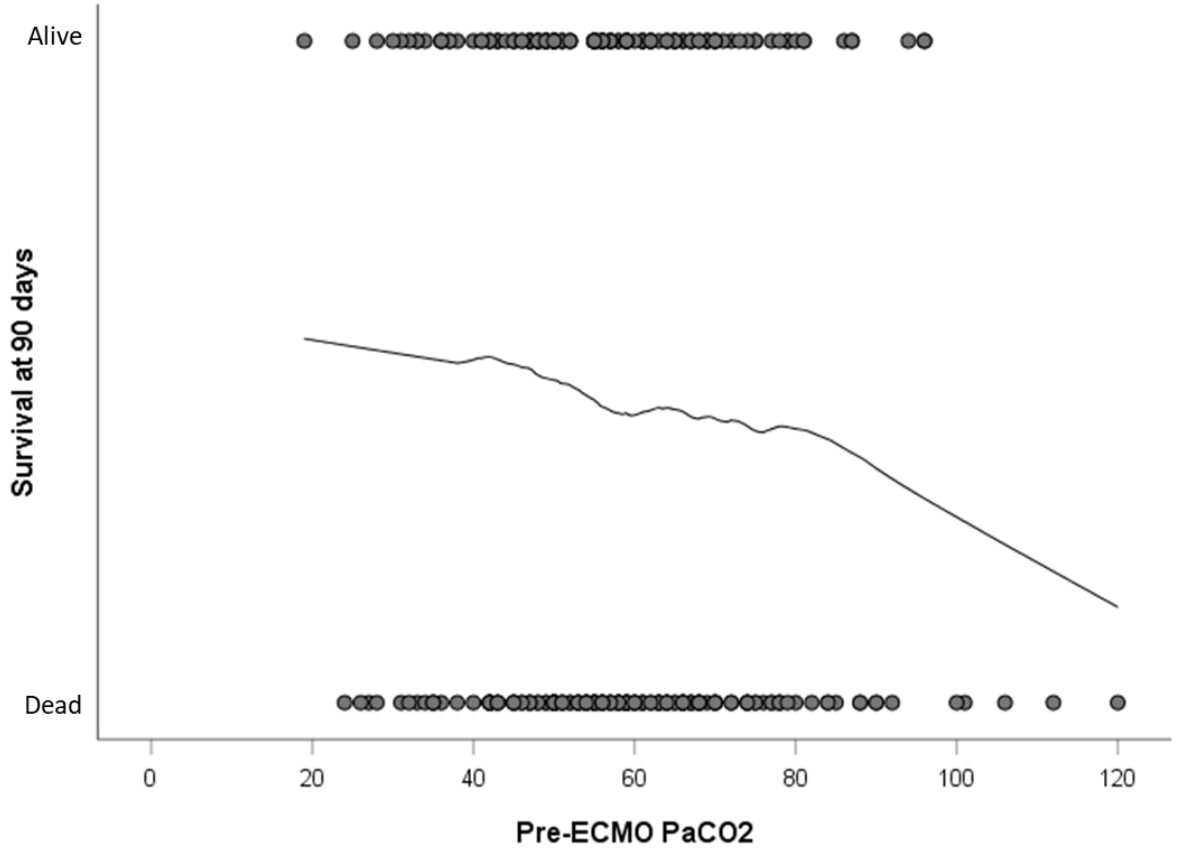

**L.**

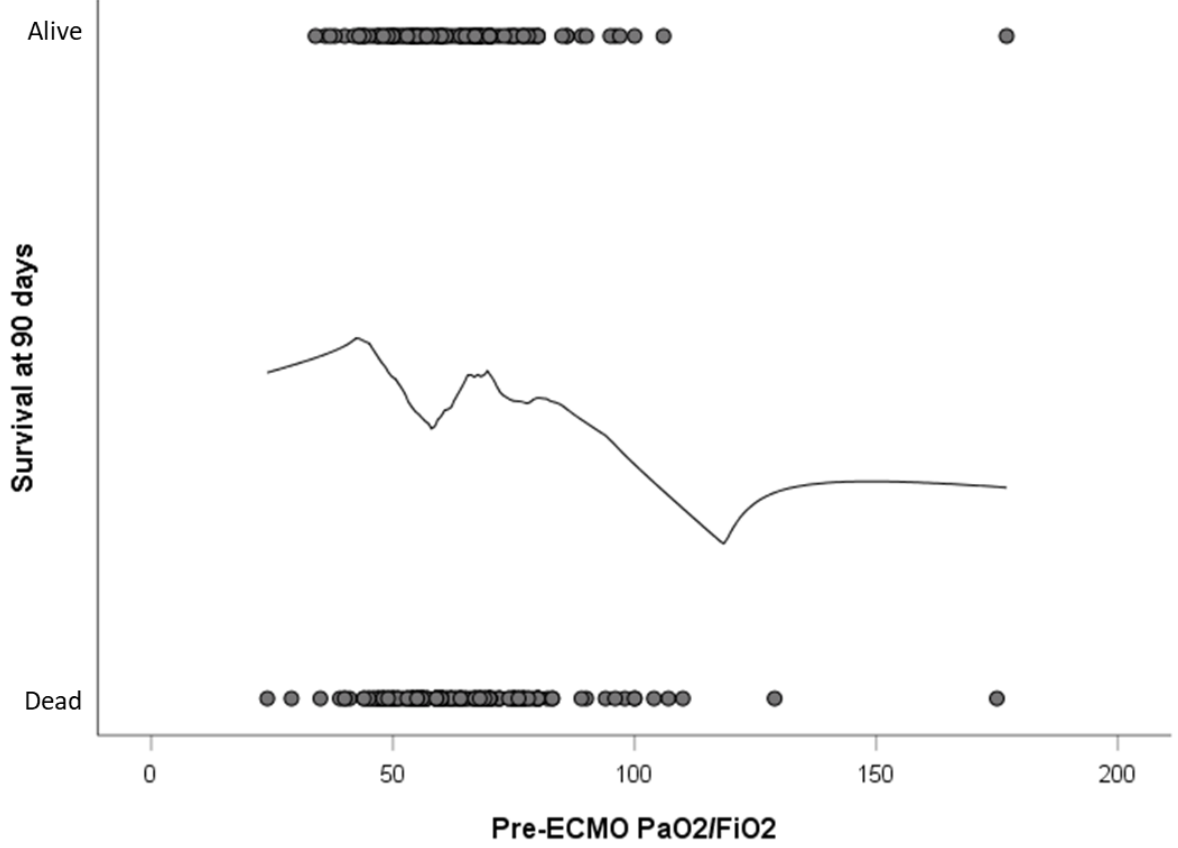

Supplement: mmc2.pdf [file mmc2.pdf]
